# Supplementary material for: AIEE active dual-state emissive tripodal pyridopyrazine derivatives as multi-stimuli responsive smart organic materials
Source: Royal Society of Chemistry journal article supplement (doi:10.1039/d4tc04692g), 2025-01-01
Supplement: d4tc04692g1.pdf [file d4tc04692g1.pdf]

### *Supporting Information*

## **AIEE Active Dual-State Emissive Tripodal Pyridopyrazine Derivatives as Multi-Stimuli Responsive Smart Organic Materials**

Monika Lamoria,<sup>a</sup> Debashree Manna,<sup>b</sup> Marilyn Daisy Milton<sup>a\*</sup>

<sup>a</sup>*Functional Organic Molecules Synthesis Laboratory, Department of Chemistry, University of Delhi, Delhi-110007, India*

<sup>b</sup>*Institute of Organic Chemistry and Biochemistry, Czech Academy of Sciences, v.v.i., Flemingovo n'am. 2, Prague 6, Praha 16610, Czech Republic*

\*Email: [mdmilton@chemistry.du.ac.in](mailto:mdmilton@chemistry.du.ac.in)

|                                                                               |                     |
|-------------------------------------------------------------------------------|---------------------|
| 1. <sup>1</sup> H NMR and <sup>13</sup> C NMR spectra of <b>PP1-PP5</b> ..... | <b>Fig. S1-S10</b>  |
| 2. HRMS spectra of <b>PP1-PP5</b> .....                                       | <b>Fig. S11-S15</b> |
| 3. Crystal data of <b>PP4</b> .....                                           | <b>Table S1</b>     |
| 4. Emission data in different solvents.....                                   | <b>Table S2</b>     |
| 5. Photophysical properties.....                                              | <b>Fig. S16-S27</b> |
| 6. Average particle size of aggregates.....                                   | <b>Table S3</b>     |
| 7. Limits of detection for <b>PP1-PP5</b> .....                               | <b>Table S4</b>     |
| 8. DFT studies.....                                                           | <b>Fig. S28-S35</b> |
| 9. TDDFT absorption and emission wavelengths.....                             | <b>Table S5</b>     |
| 10. Temperature dependent changes for <b>PP1-PP5</b> .....                    | <b>Fig. S36</b>     |
| 11. TGA curves for <b>PP1-PP5</b> .....                                       | <b>Fig. S37</b>     |

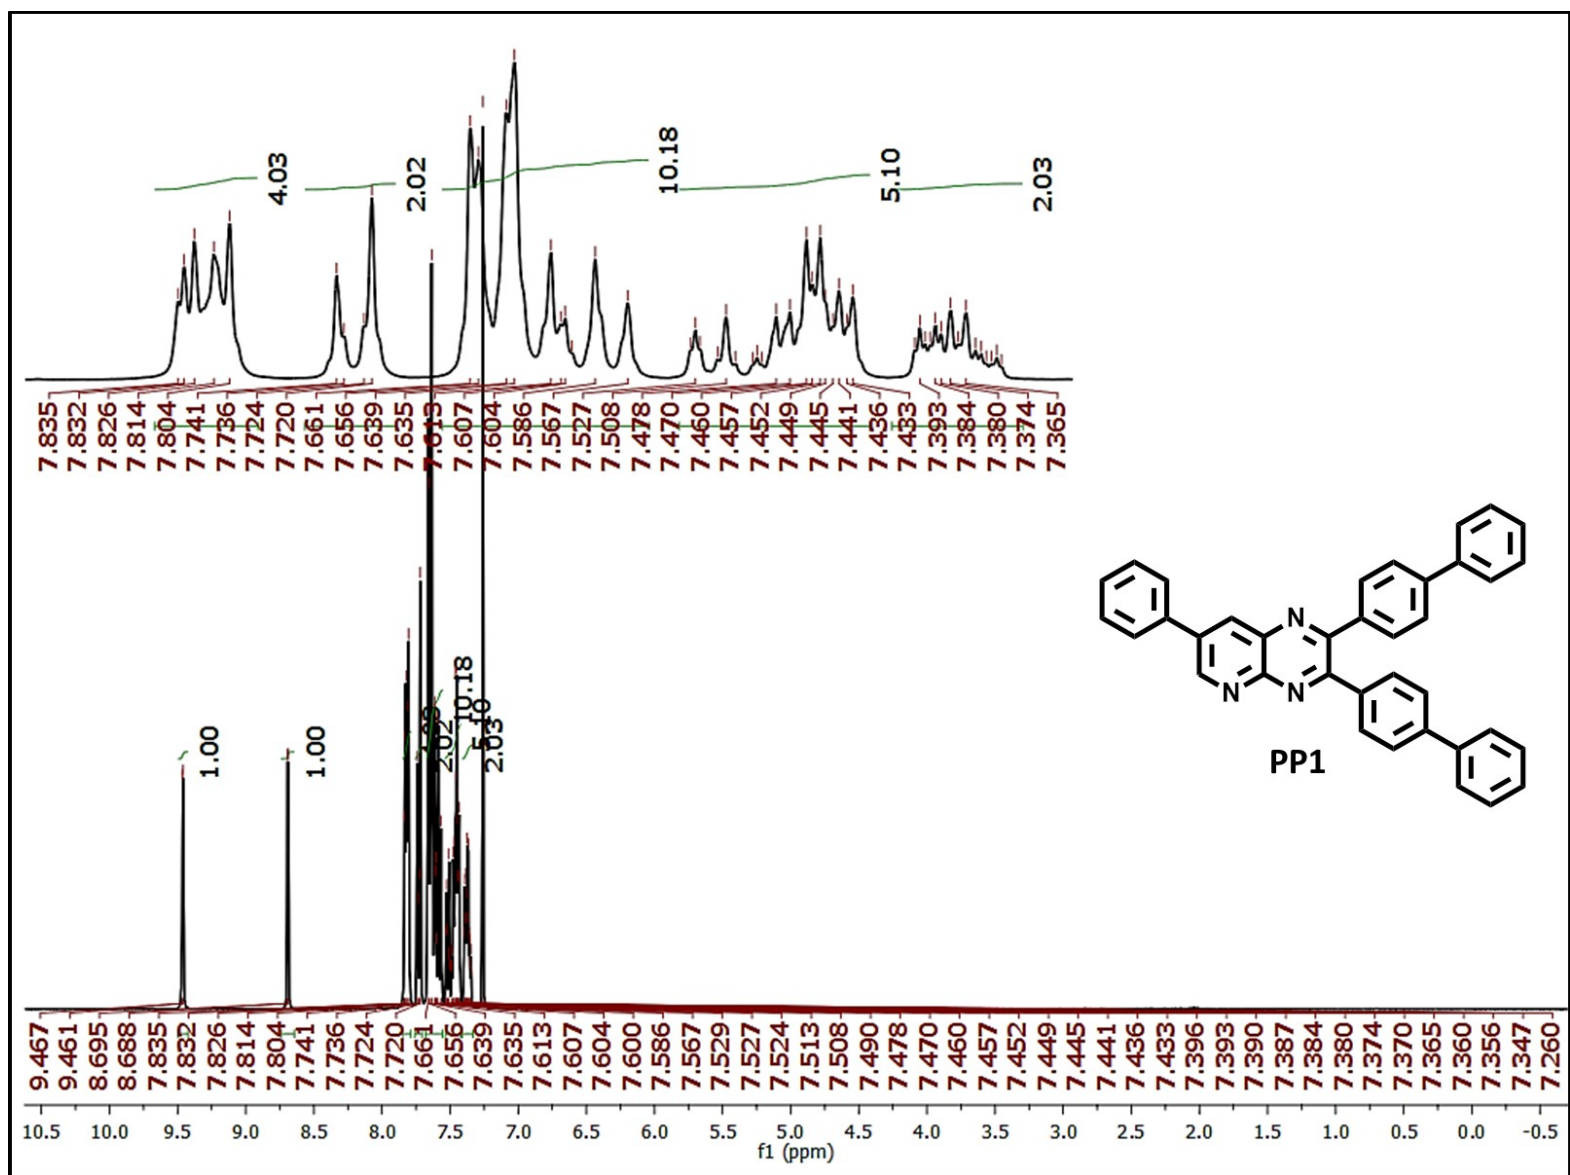

Fig. S1. <sup>1</sup>H NMR (400 MHz, CDCl<sub>3</sub>) spectrum of 2,3-di([1,1'-biphenyl]-4-yl)-7-phenylpyrido[2,3-b]pyrazine (PP1)

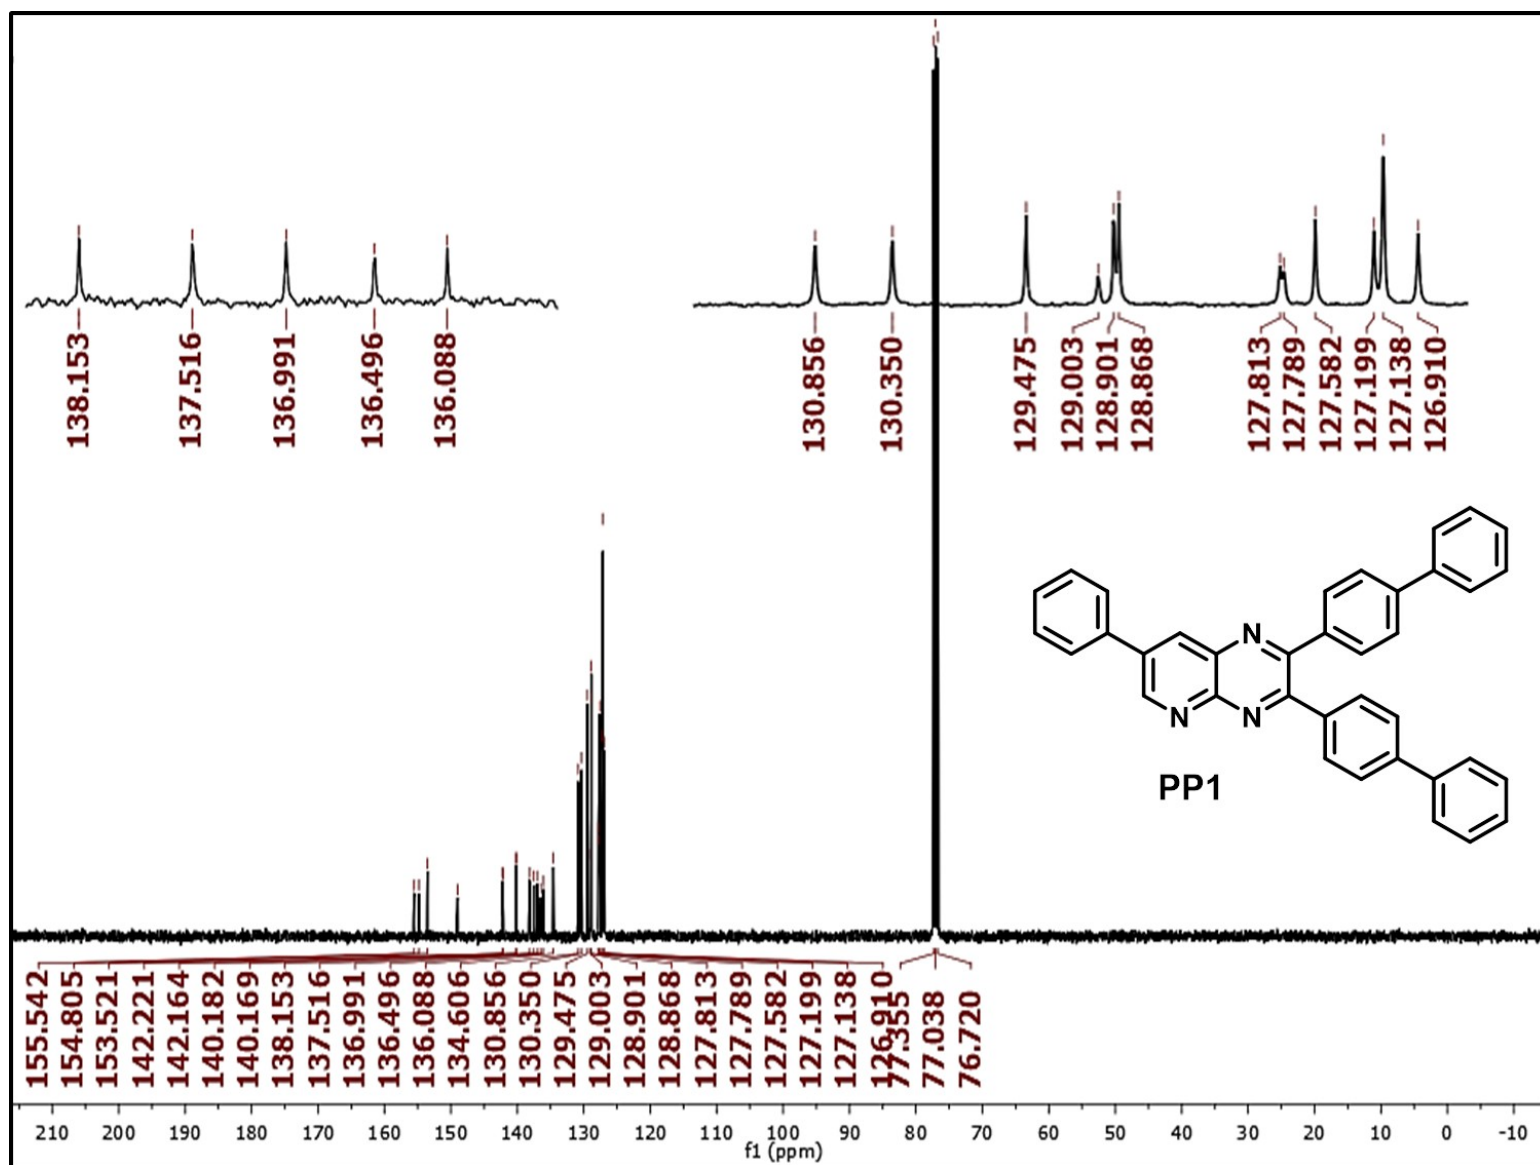

Fig. S2. <sup>13</sup>C NMR (100 MHz, CDCl<sub>3</sub>) spectrum of 2,3-di([1,1'-biphenyl]-4-yl)-7-phenylpyrido[2,3-b]pyrazine (PP1)

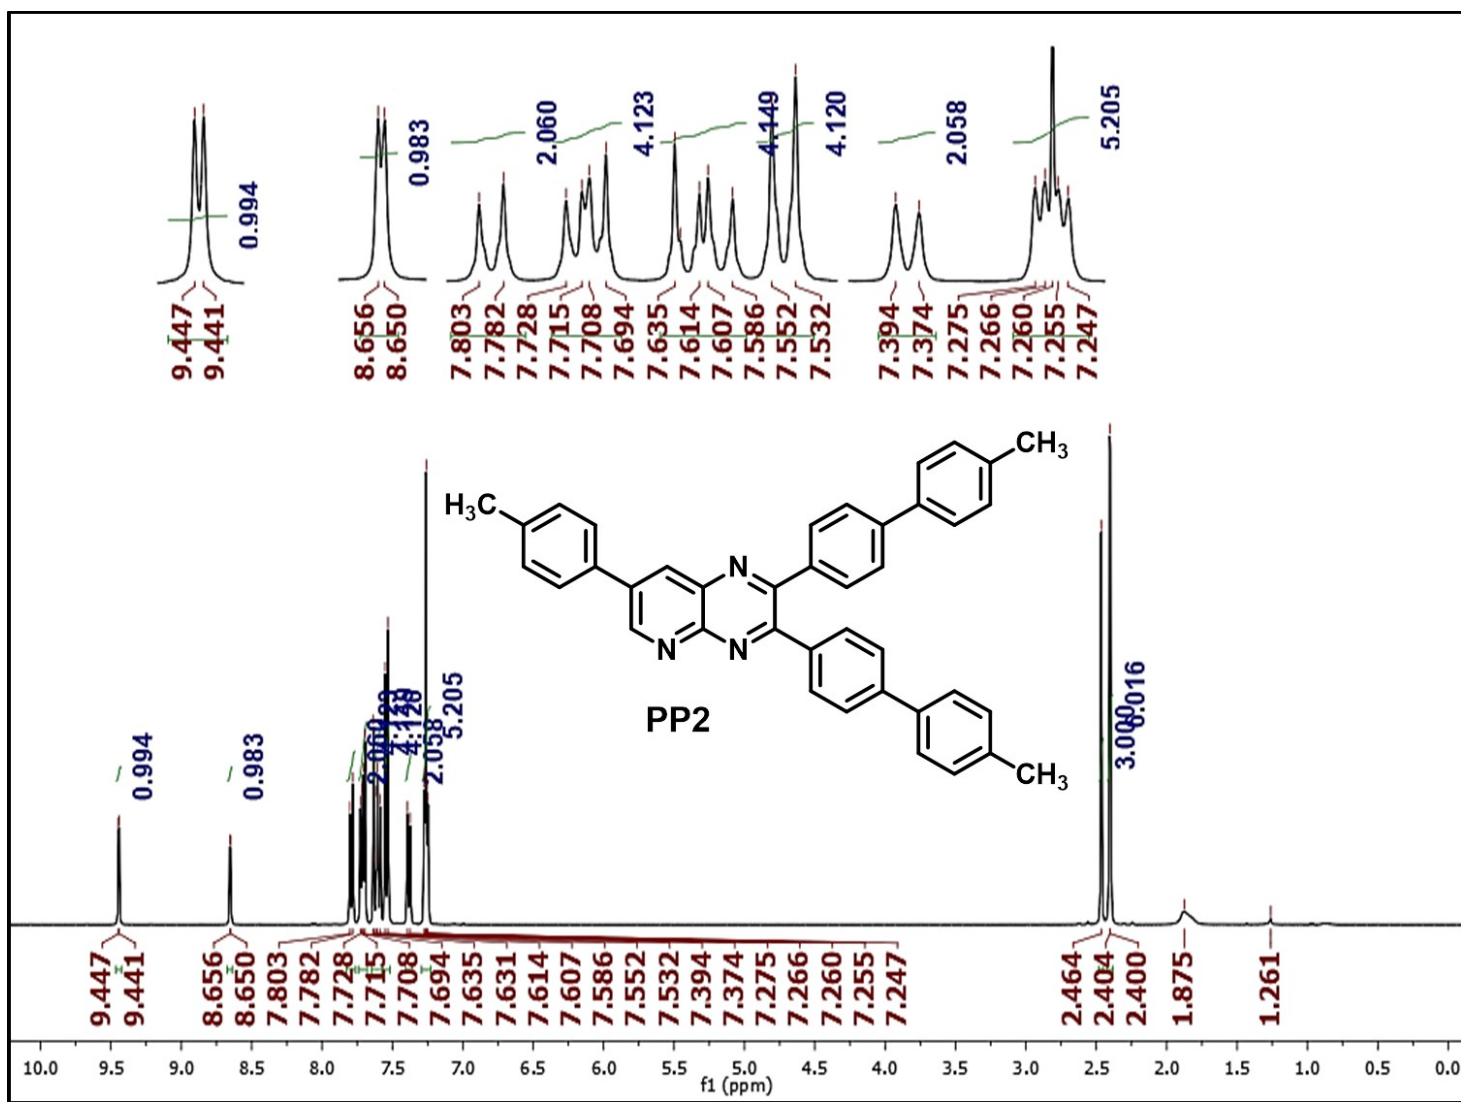

Fig. S3. <sup>1</sup>H NMR (400 MHz, CDCl<sub>3</sub>) spectrum of 2,3-bis(4'-methyl-[1,1'-biphenyl]-4-yl)-7-(p-tolyl)pyrido[2,3-b]pyrazine (PP2)

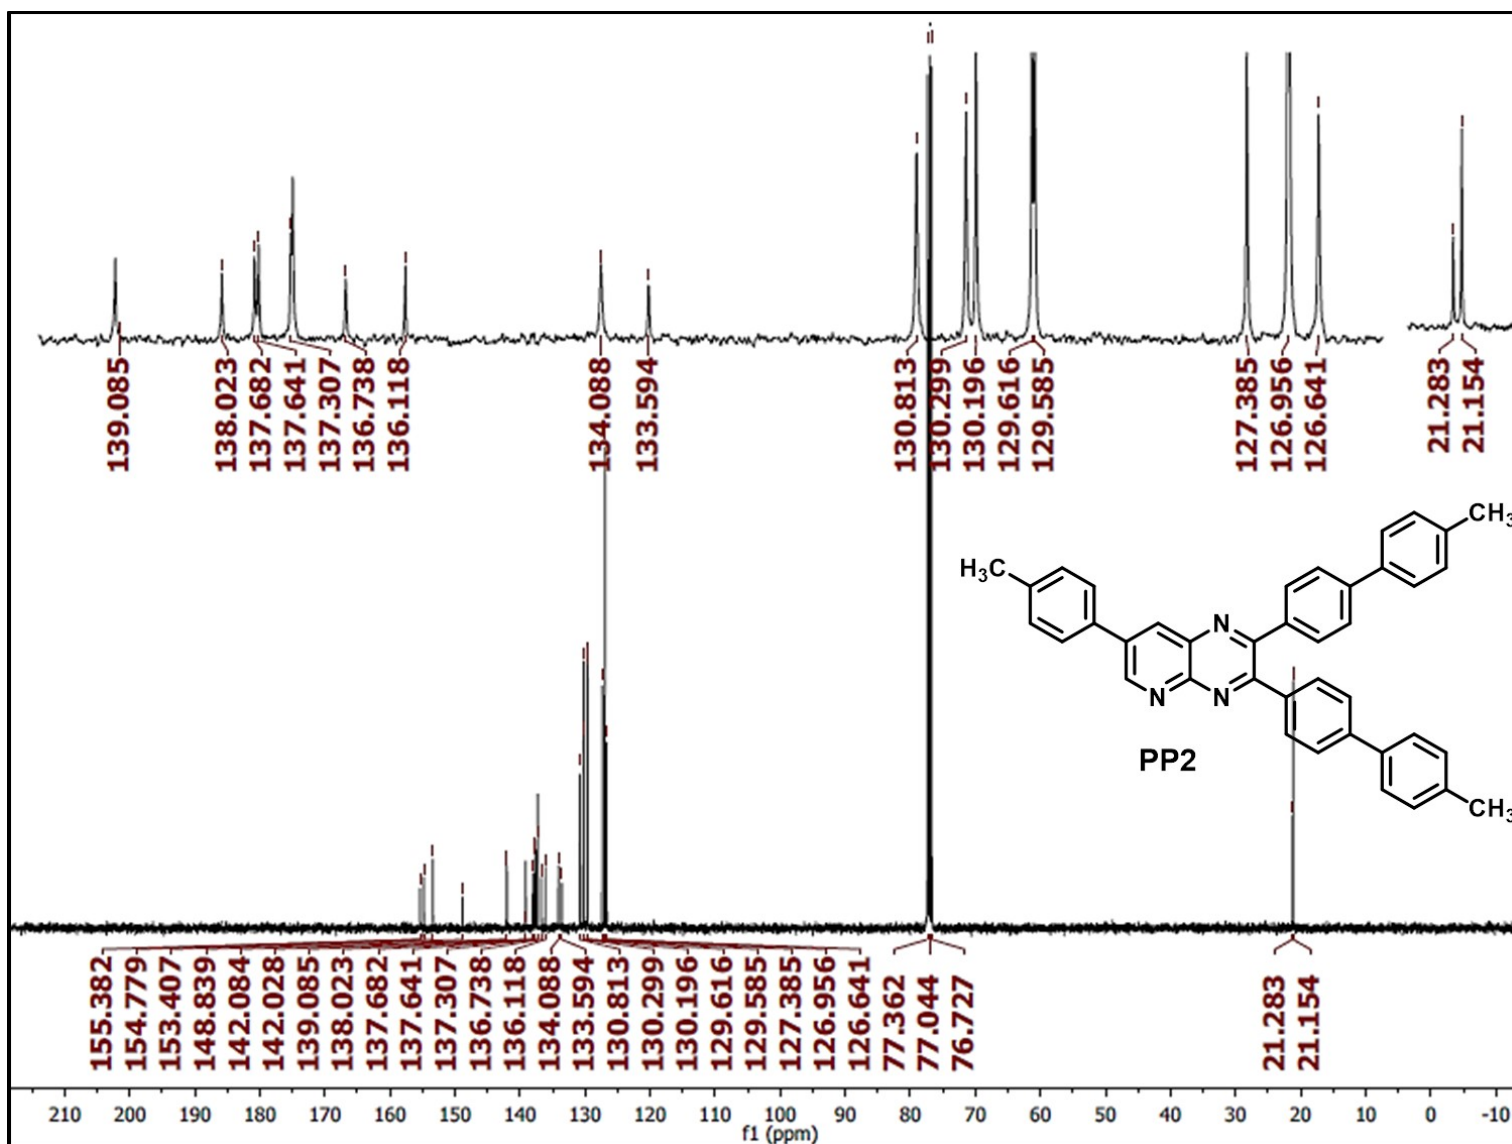

Fig. S4.  $^{13}\text{C}$  NMR (100 MHz,  $\text{CDCl}_3$ ) spectrum of 2,3-bis(4'-methyl-[1,1'-biphenyl]-4-yl)-7-(p-tolyl)pyrido[2,3-b]pyrazine (PP2)

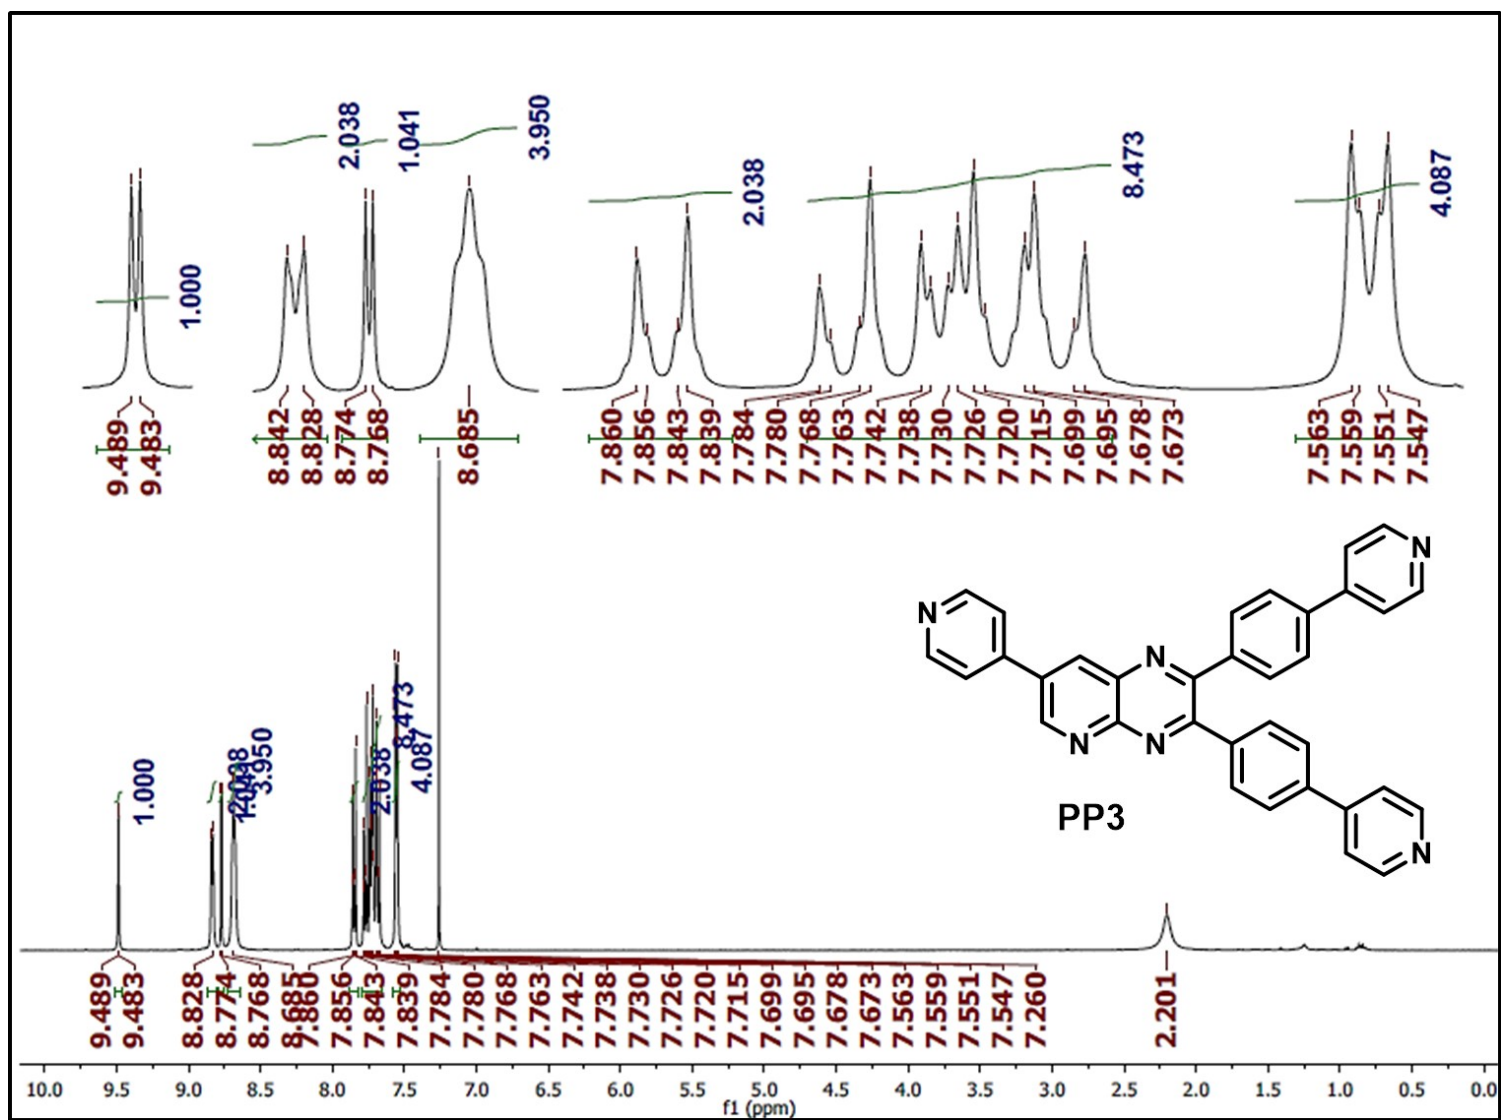

Fig. S5. <sup>1</sup>H NMR (400 MHz, CDCl<sub>3</sub>) spectrum of 7-(pyridin-4-yl)-2,3-bis(4-(pyridin-4-yl)phenyl)pyrido[2,3-b]pyrazine (PP3)

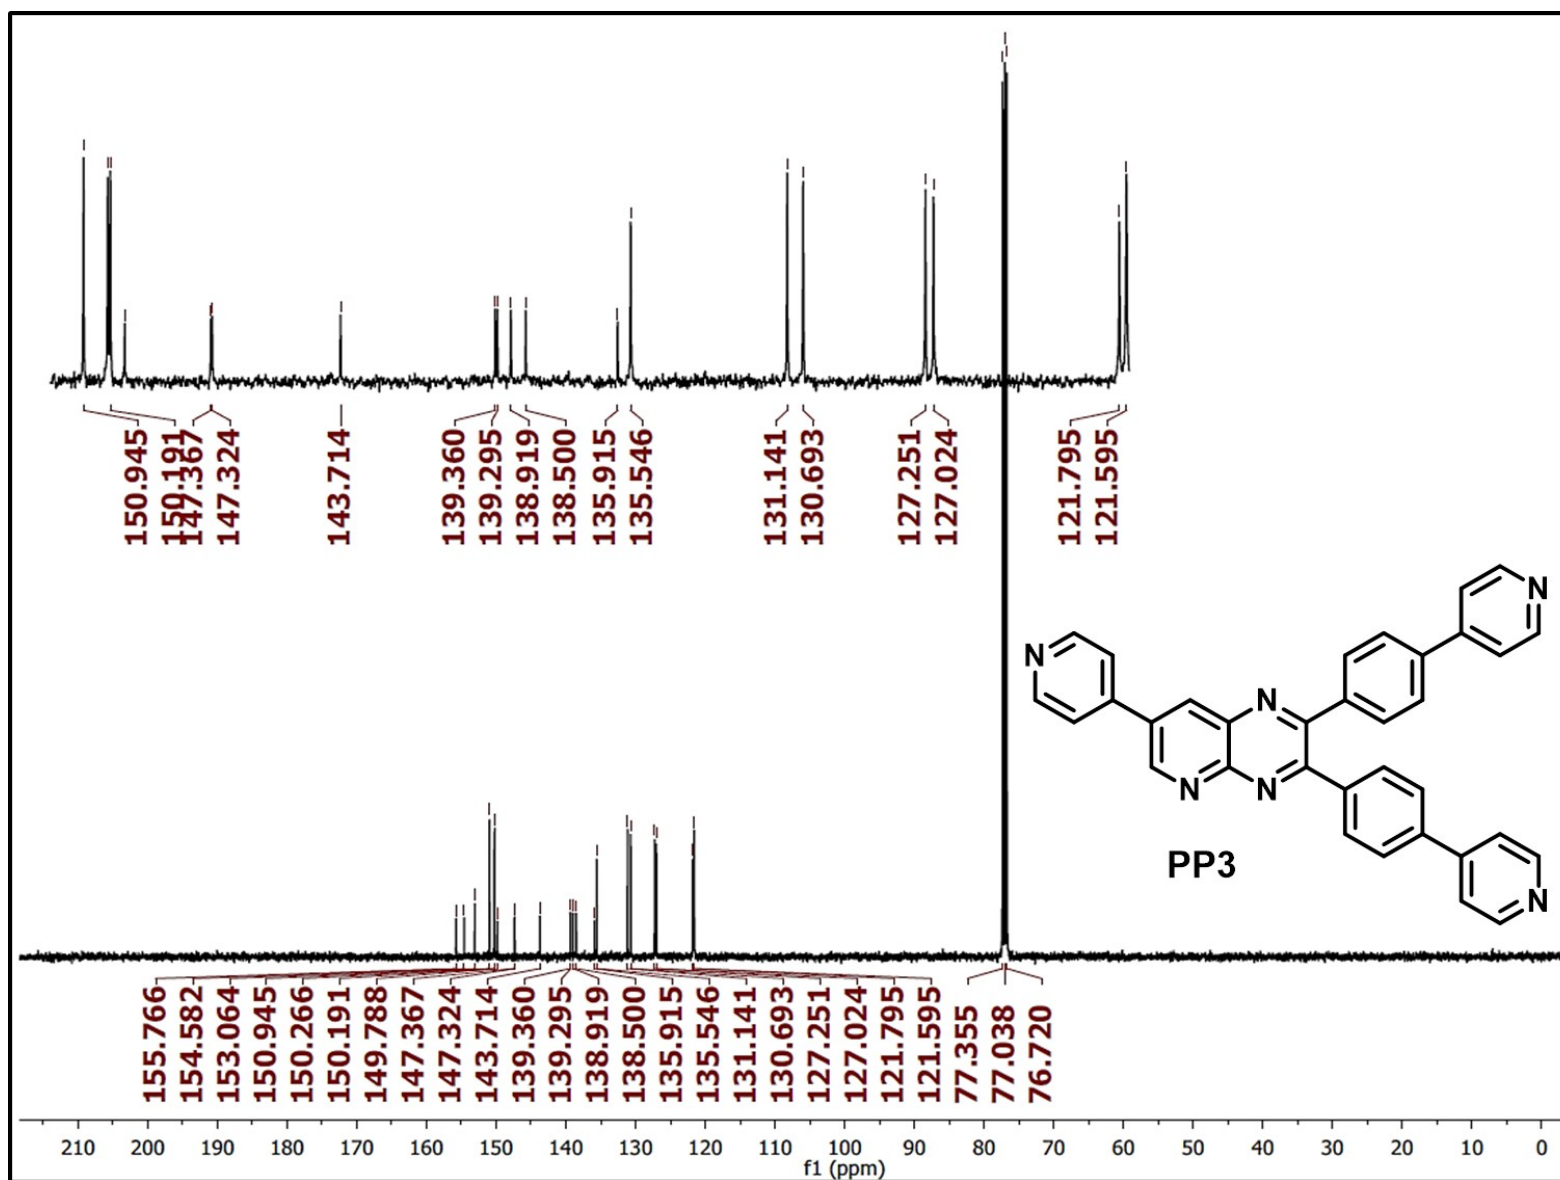

**Fig. S6.** <sup>13</sup>C NMR (100 MHz, CDCl<sub>3</sub>) spectrum of 7-(pyridin-4-yl)-2,3-bis(4-(pyridin-4-yl)phenyl)pyrido[2,3-b]pyrazine (PP3)

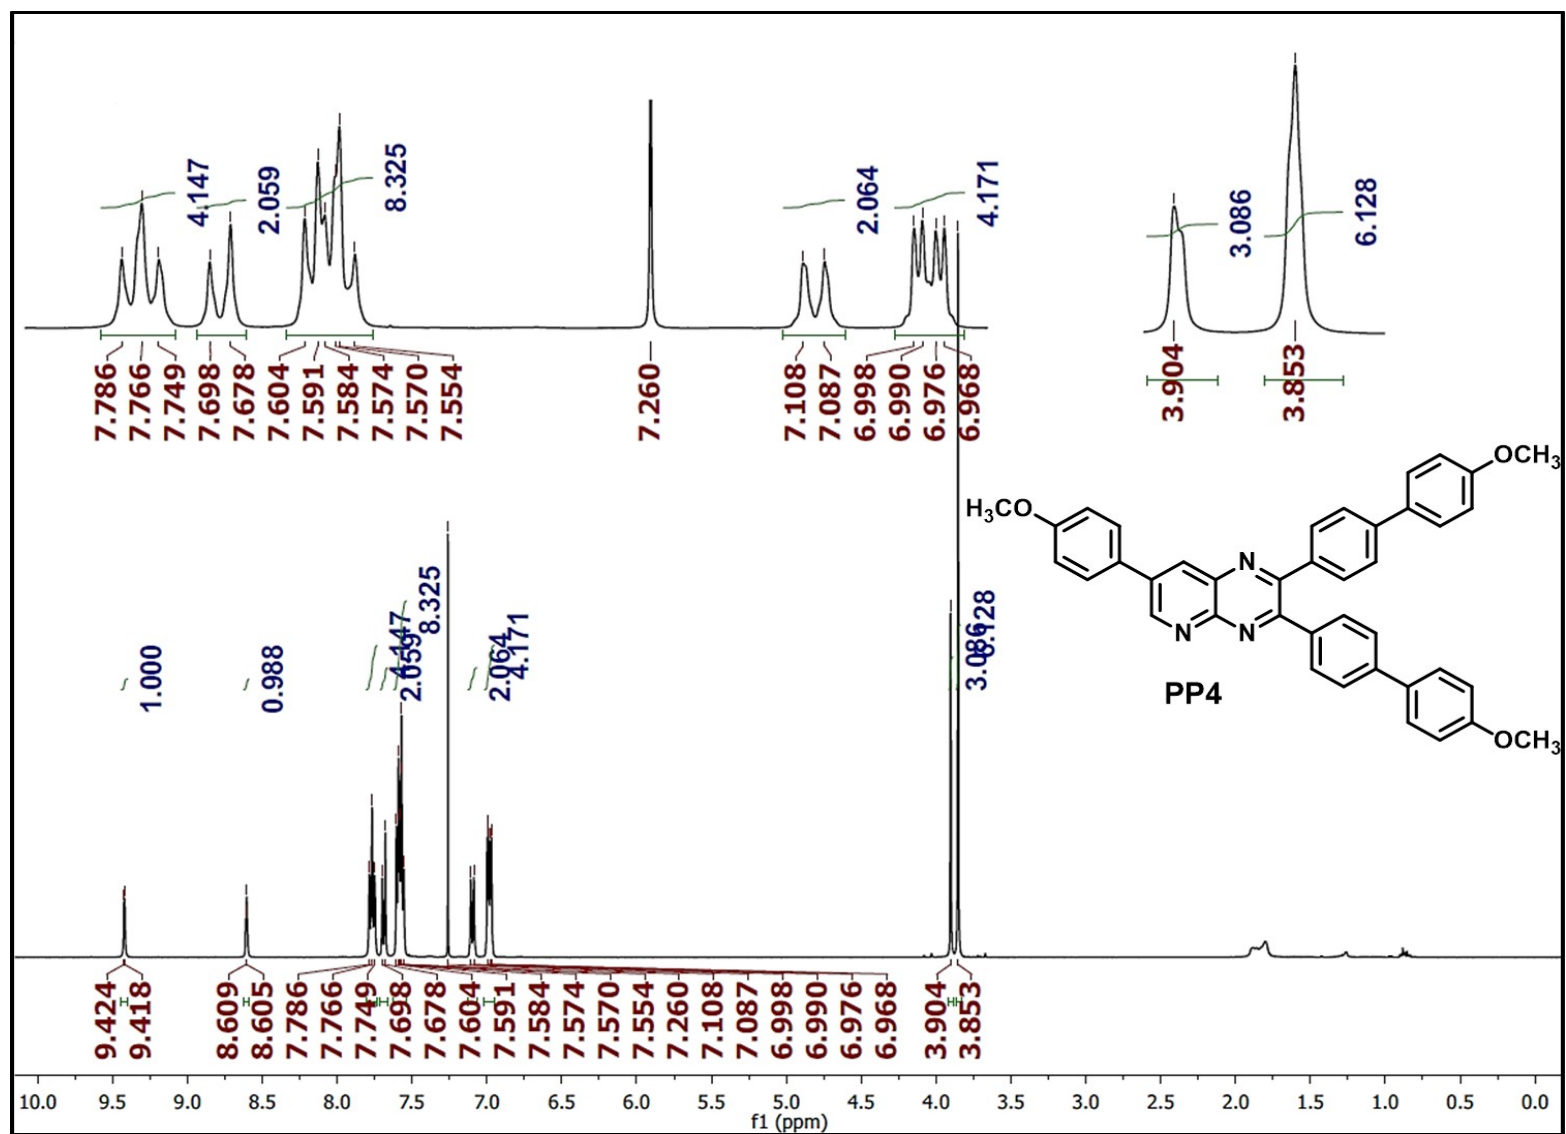

Fig. S7. <sup>1</sup>H NMR (400 MHz, CDCl<sub>3</sub>) spectrum of 2,3-bis(4'-methoxy-[1,1'-biphenyl]-4-yl)-7-(4-methoxyphenyl)pyrido[2,3-b]pyrazine (PP4)



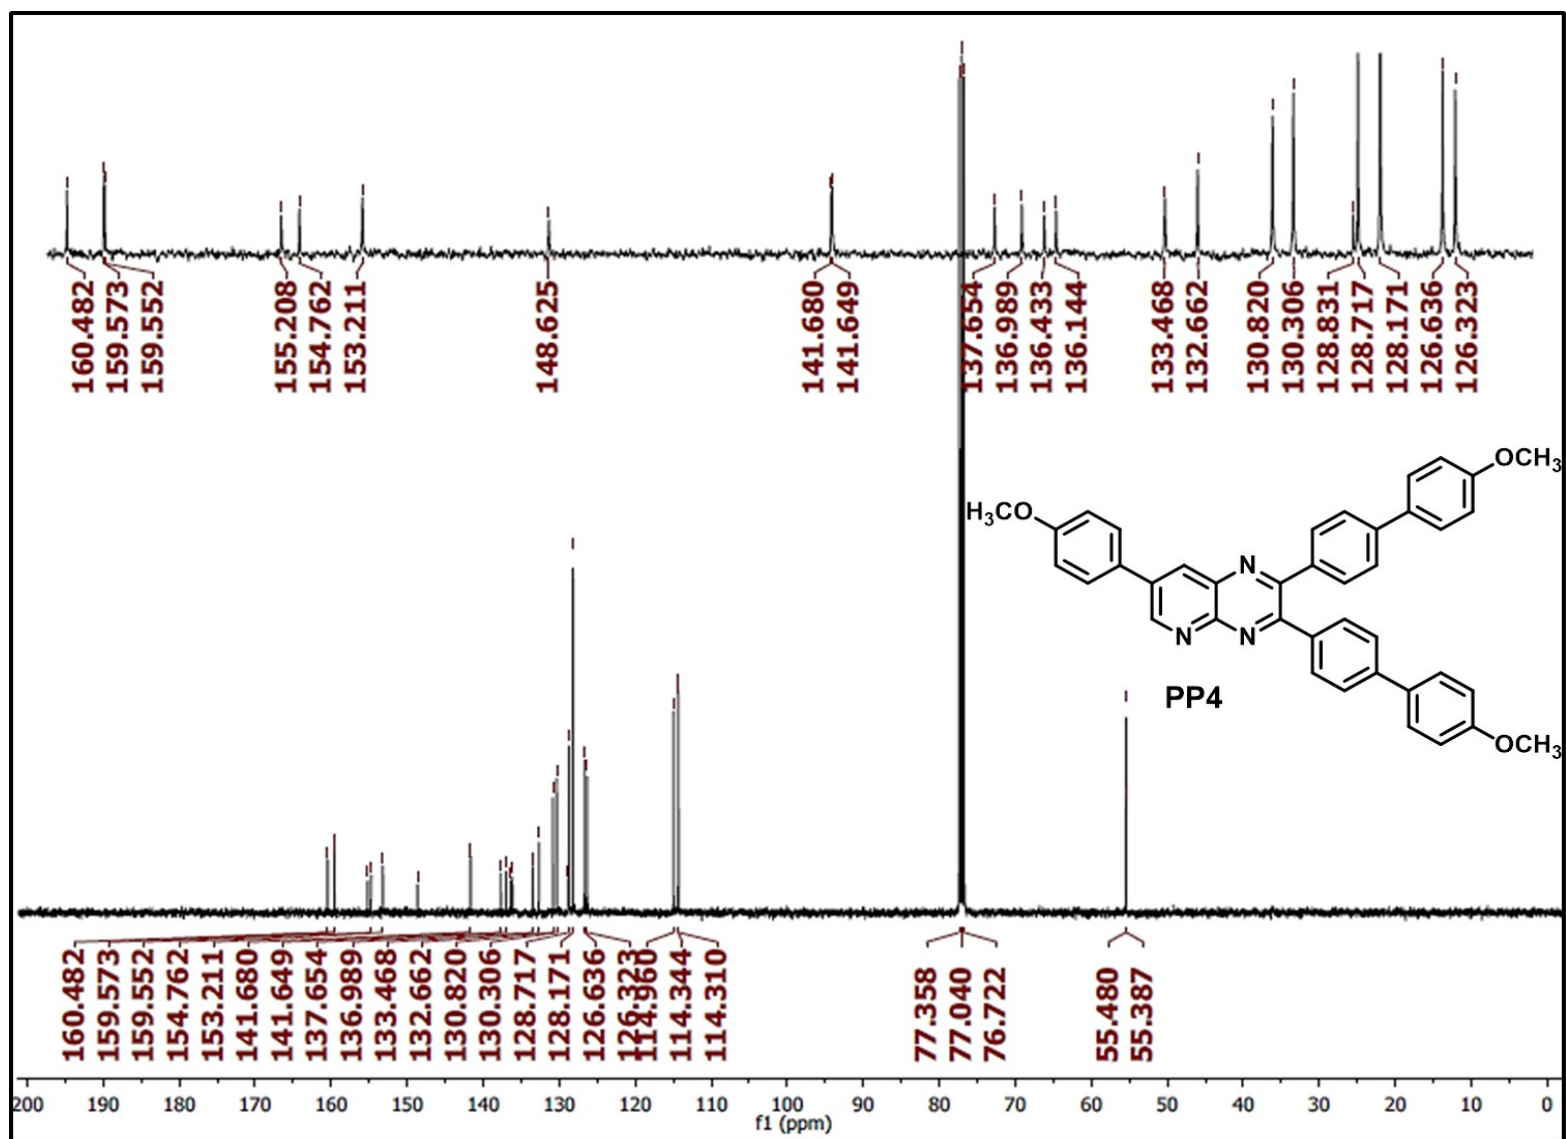

**Fig. S8.** <sup>13</sup>C NMR (100 MHz, CDCl<sub>3</sub>) spectrum of 2,3-bis(4'-methoxy-[1,1'-biphenyl]-4-yl)-7-(4-methoxyphenyl)pyrido[2,3-b]pyrazine (PP4)





**Compound Table**

| Compound Label    | RT    | Mass     | Abund  | Formula    | Tgt Mass | Diff (ppm) | MFG Formula | DB Formula |
|-------------------|-------|----------|--------|------------|----------|------------|-------------|------------|
| Cpd 1: C37 H25 N3 | 0.078 | 511.2057 | 737667 | C37 H25 N3 | 511.2048 | 1.58       | C37 H25 N3  | C37 H25 N3 |

| Compound Label    | <i>m/z</i> | RT    | Algorithm       | Mass     |
|-------------------|------------|-------|-----------------|----------|
| Cpd 1: C37 H25 N3 | 512.213    | 0.078 | Find By Formula | 511.2057 |

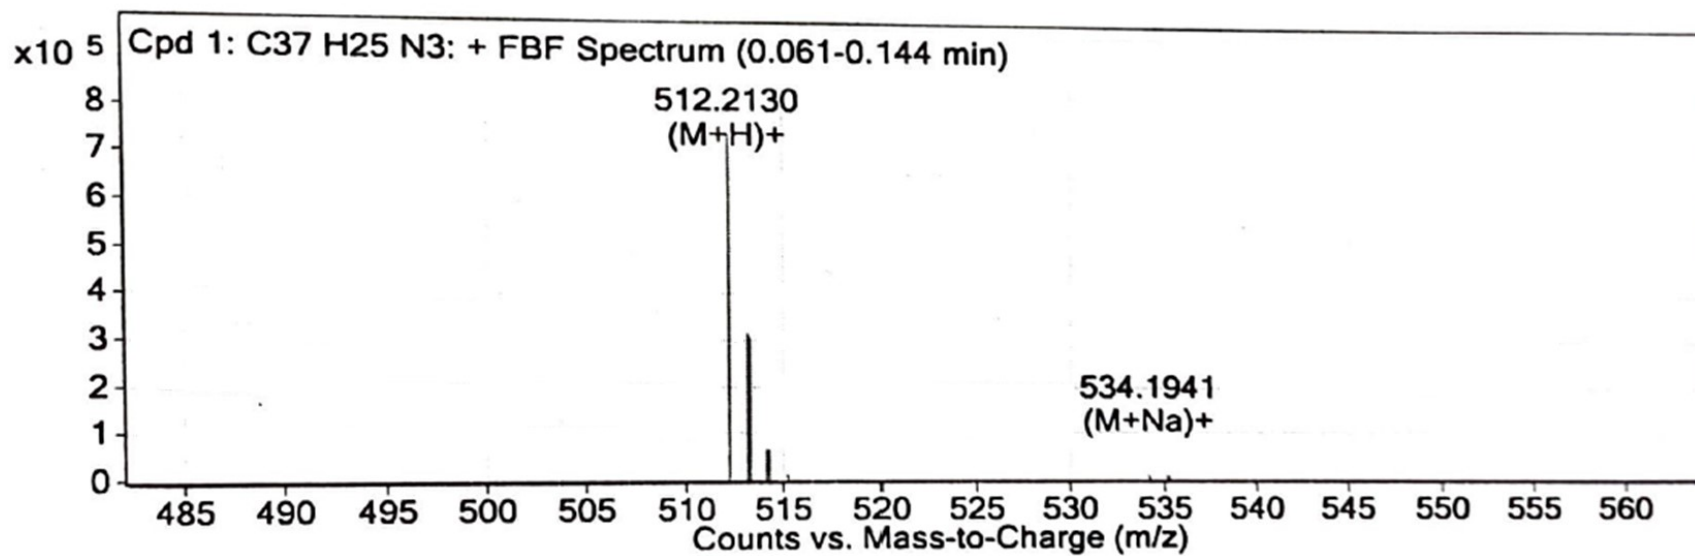

Fig. S11. HRMS spectrum of 2,3-di([1,1'-biphenyl]-4-yl)-7-phenylpyrido[2,3-b]pyrazine (PP1)

**Compound Table**

| Compound Label    | RT    | Mass     | Abund  | Formula    | Tgt Mass | Diff (ppm) | MFG Formula | DB Formula |
|-------------------|-------|----------|--------|------------|----------|------------|-------------|------------|
| Cpd 1: C40 H31 N3 | 0.089 | 553.2522 | 312621 | C40 H31 N3 | 553.2518 | 0.72       | C40 H31 N3  | C40 H31 N3 |

| Compound Label    | m/z      | RT    | Algorithm       | Mass     |
|-------------------|----------|-------|-----------------|----------|
| Cpd 1: C40 H31 N3 | 554.2596 | 0.089 | Find By Formula | 553.2522 |

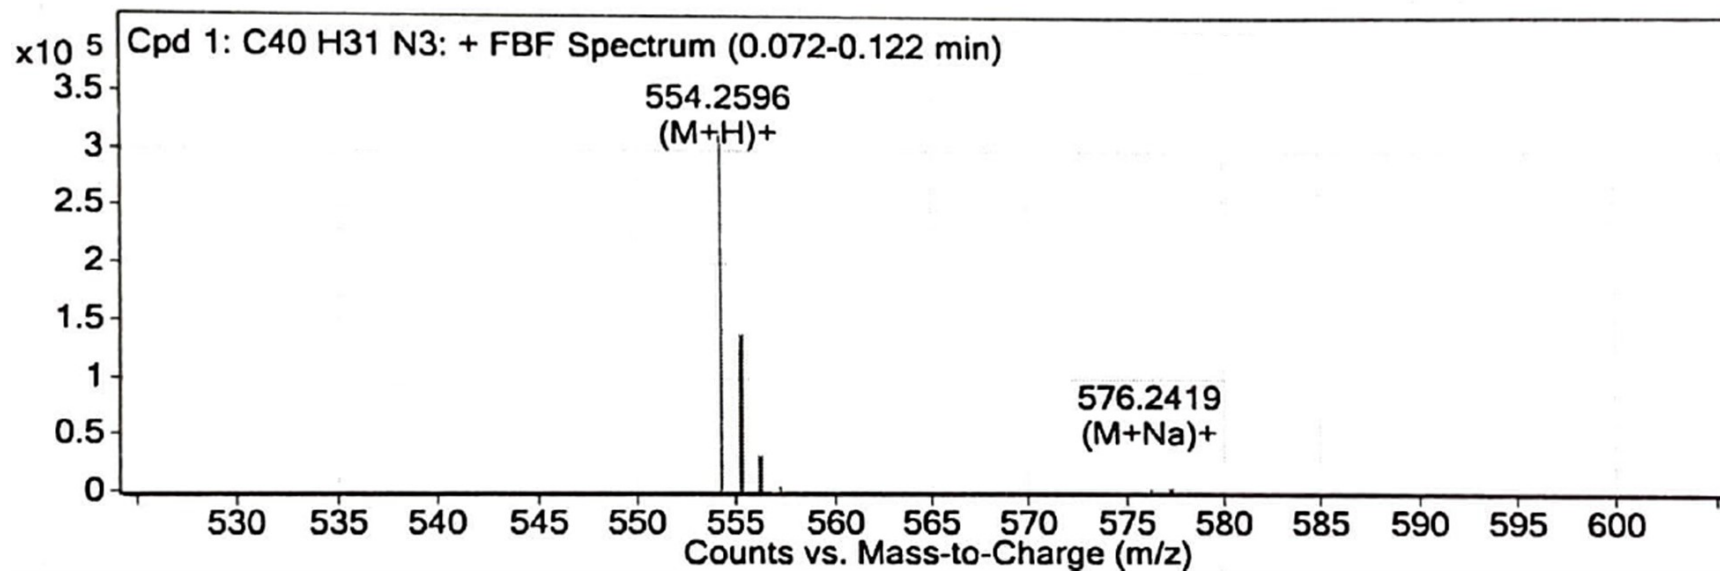

Fig. S12. HRMS spectrum of 2,3-bis(4'-methyl-[1,1'-biphenyl]-4-yl)-7-(p-tolyl)pyrido[2,3-b]pyrazine (PP2)

**Compound Table**

| Compound Label                                        | RT    | Mass     | Abund  | Formula                                        | Tgt Mass | Diff (ppm) | MFG Formula                                    | DB Formula                                     |
|-------------------------------------------------------|-------|----------|--------|------------------------------------------------|----------|------------|------------------------------------------------|------------------------------------------------|
| Cpd 1: C <sub>34</sub> H <sub>22</sub> N <sub>6</sub> | 0.103 | 514.1911 | 387435 | C <sub>34</sub> H <sub>22</sub> N <sub>6</sub> | 514.1906 | 1.05       | C <sub>34</sub> H <sub>22</sub> N <sub>6</sub> | C <sub>34</sub> H <sub>22</sub> N <sub>6</sub> |

| Compound Label                                        | <i>m/z</i> | RT    | Algorithm       | Mass     |
|-------------------------------------------------------|------------|-------|-----------------|----------|
| Cpd 1: C <sub>34</sub> H <sub>22</sub> N <sub>6</sub> | 515.1988   | 0.103 | Find By Formula | 514.1911 |

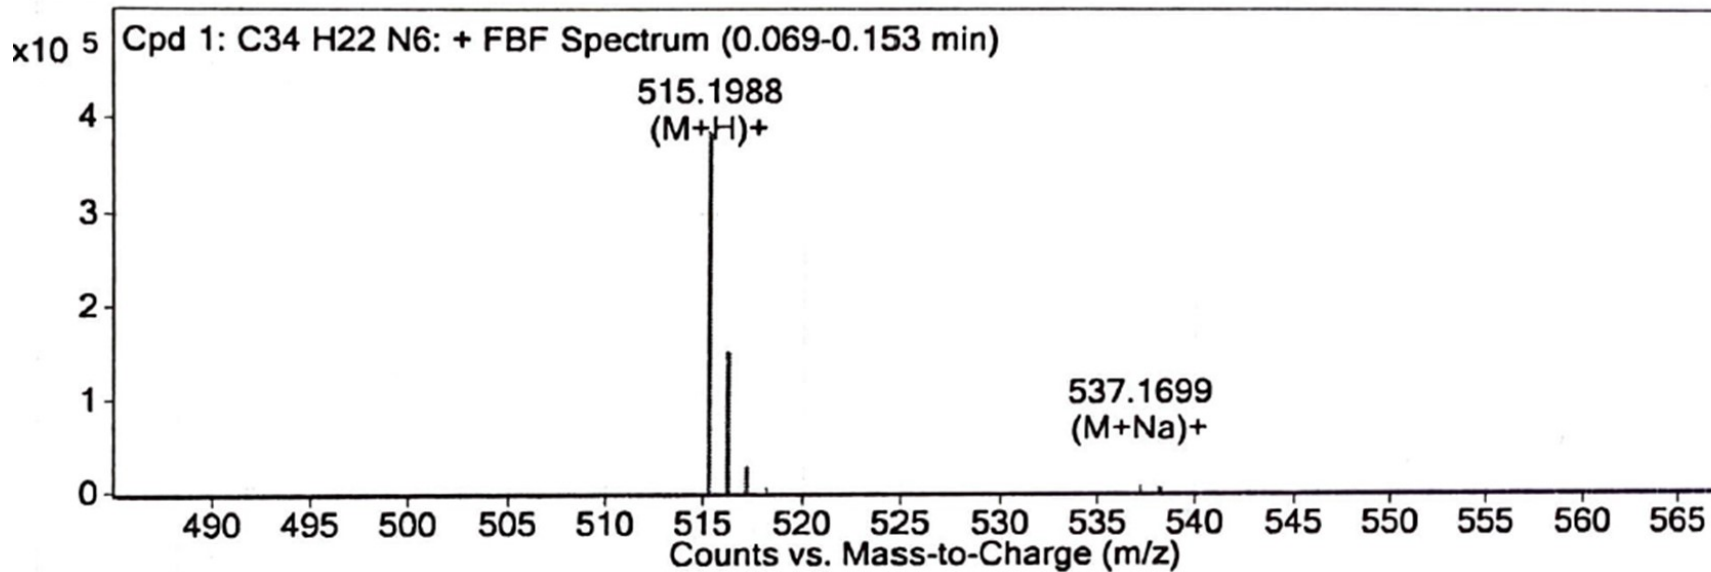

Fig. S13. HRMS spectrum of 7-(pyridin-4-yl)-2,3-bis(4-(pyridin-4-yl)phenyl)pyrido[2,3-b]pyrazine (PP3)

**Compound Table**

| Compound Label       | RT    | Mass    | Abund  | Formula       | Tgt Mass | Diff (ppm) | MFG Formula   | DB Formula    |
|----------------------|-------|---------|--------|---------------|----------|------------|---------------|---------------|
| Cpd 1: C40 H31 N3 O3 | 0.086 | 601.237 | 358117 | C40 H31 N3 O3 | 601.2365 | 0.73       | C40 H31 N3 O3 | C40 H31 N3 O3 |

| Compound Label       | <i>m/z</i> | RT    | Algorithm       | Mass    |
|----------------------|------------|-------|-----------------|---------|
| Cpd 1: C40 H31 N3 O3 | 602.2443   | 0.086 | Find By Formula | 601.237 |

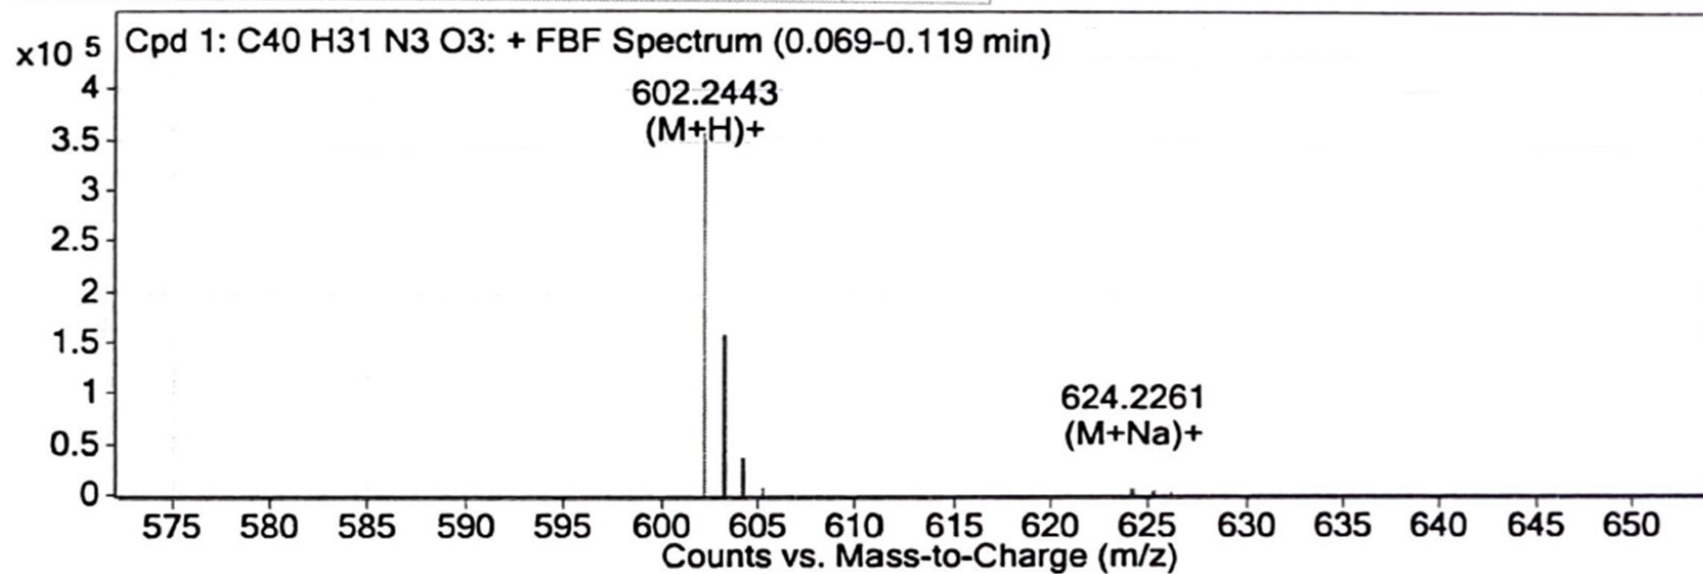

Fig. S14. HRMS spectrum of 2,3-bis(4'-methoxy-[1,1'-biphenyl]-4-yl)-7-(4-methoxyphenyl)pyrido[2,3-b]pyrazine (PP4)

**Compound Table**

| Compound Label       | RT    | Mass     | Abund  | Formula       | Tgt Mass | Diff (ppm) | MFG Formula   | DB Formula    |
|----------------------|-------|----------|--------|---------------|----------|------------|---------------|---------------|
| Cpd 1: C40 H25 N3 O3 | 0.083 | 595.1893 | 130738 | C40 H25 N3 O3 | 595.1896 | -0.51      | C40 H25 N3 O3 | C40 H25 N3 O3 |

| Compound Label       | <i>m/z</i> | RT    | Algorithm       | Mass     |
|----------------------|------------|-------|-----------------|----------|
| Cpd 1: C40 H25 N3 O3 | 596.1967   | 0.083 | Find By Formula | 595.1893 |

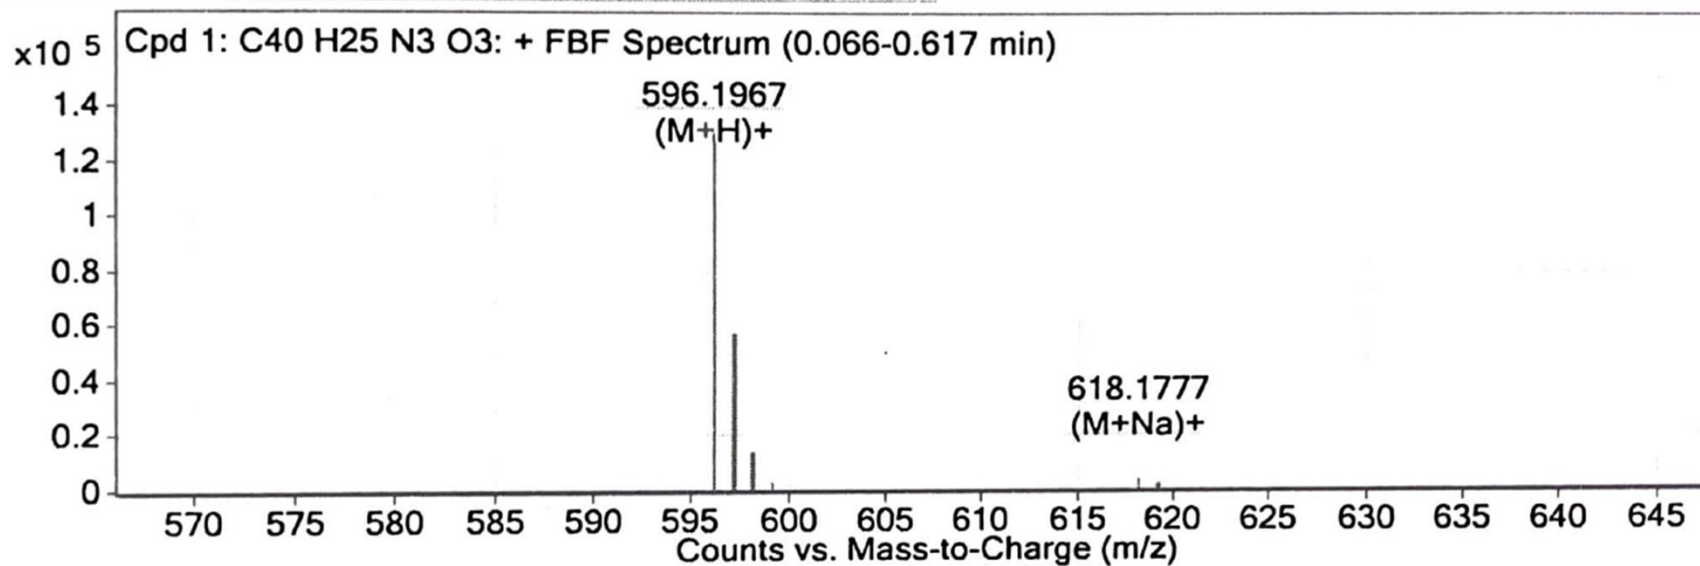

**Fig. S15.** HRMS spectrum of 4',4'''-(7-(4-formylphenyl)pyrido[2,3-*b*]pyrazine-2,3-diyl)bis(((1,1'-biphenyl]-4-carbaldehyde)) (PP5)



**Table S1. Crystal data and structure refinement for PP4**

|                                             |                                                               |
|---------------------------------------------|---------------------------------------------------------------|
| Identification code                         | PP4                                                           |
| Empirical formula                           | C <sub>40</sub> H <sub>31</sub> N <sub>3</sub> O <sub>3</sub> |
| Formula weight                              | 601.710                                                       |
| Temperature/K                               | 298.0                                                         |
| Crystal system                              | Monoclinic                                                    |
| Space group                                 | P21/c                                                         |
| a/Å                                         | 13.2222(5)                                                    |
| b/Å                                         | 21.5979(8)                                                    |
| c/Å                                         | 12.2263(4)                                                    |
| α/°                                         | 90                                                            |
| β/°                                         | 116.927(2)                                                    |
| γ/°                                         | 90                                                            |
| Volume/Å <sup>3</sup>                       | 3113.0(2)                                                     |
| Z                                           | 4                                                             |
| ρ <sub>calc</sub> /cm <sup>3</sup>          | 1.284                                                         |
| μ/mm <sup>-1</sup>                          | 0.649                                                         |
| F(000)                                      | 1267.9                                                        |
| Crystal size/mm <sup>3</sup>                | 0.335 × 0.206 × 0.031                                         |
| Radiation                                   | Cu Kα (λ = 1.54178)                                           |
| 2θ range for data collection/°              | 7.5 to 137.16                                                 |
| Index ranges                                | -15 ≤ h ≤ 15, -25 ≤ k ≤ 26, -14 ≤ l ≤ 14                      |
| Reflections collected                       | 52329                                                         |
| Independent reflections                     | 5639 [R <sub>int</sub> = 0.0863, R <sub>sigma</sub> = 0.0539] |
| Data/restraints/parameters                  | 5639/0/429                                                    |
| Goodness-of-fit on F <sup>2</sup>           | 1.118                                                         |
| Final R indexes [I >= 2σ (I)]               | R1 = 0.0917, wR2 = 0.2514                                     |
| Final R indexes [all data]                  | R1 = 0.1336, wR2 = 0.3320                                     |
| Largest diff. peak/hole / e Å <sup>-3</sup> | 0.26/-0.37                                                    |

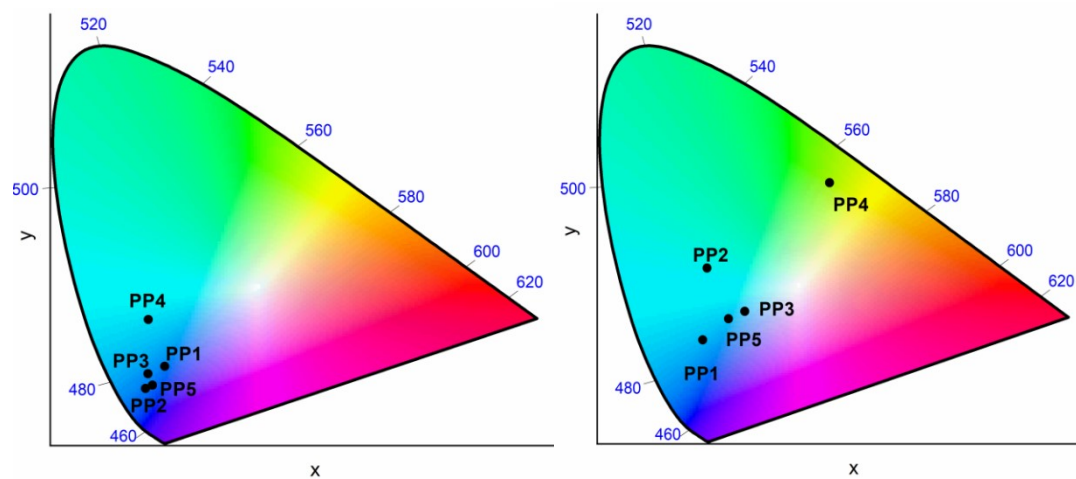

**Fig. S16.** CIE chromaticity diagrams for **PP1-PP5** in solution and solid state respectively.

**Table S2:** The emission data of compounds **PP1**, **PP2** and **PP4** in solvents of differing polarity.

|                        | <b>Compound</b> | <b>Toluene</b> | <b>THF</b> | <b>CHCl<sub>3</sub></b> | <b>CH<sub>3</sub>CN</b> | <b>DMSO</b> | <b><math>\Delta\lambda_{em}</math> (nm)</b> |
|------------------------|-----------------|----------------|------------|-------------------------|-------------------------|-------------|---------------------------------------------|
| $\lambda_{em}$<br>(nm) | <b>PP1</b>      | 446            | 448        | 447                     | 449                     | 456         | 10                                          |
|                        | <b>PP2</b>      | 440            | 449        | 455                     | 456                     | 467         | 18                                          |
|                        | <b>PP4</b>      | 455            | 473        | 475                     | 499                     | 518         | 63                                          |

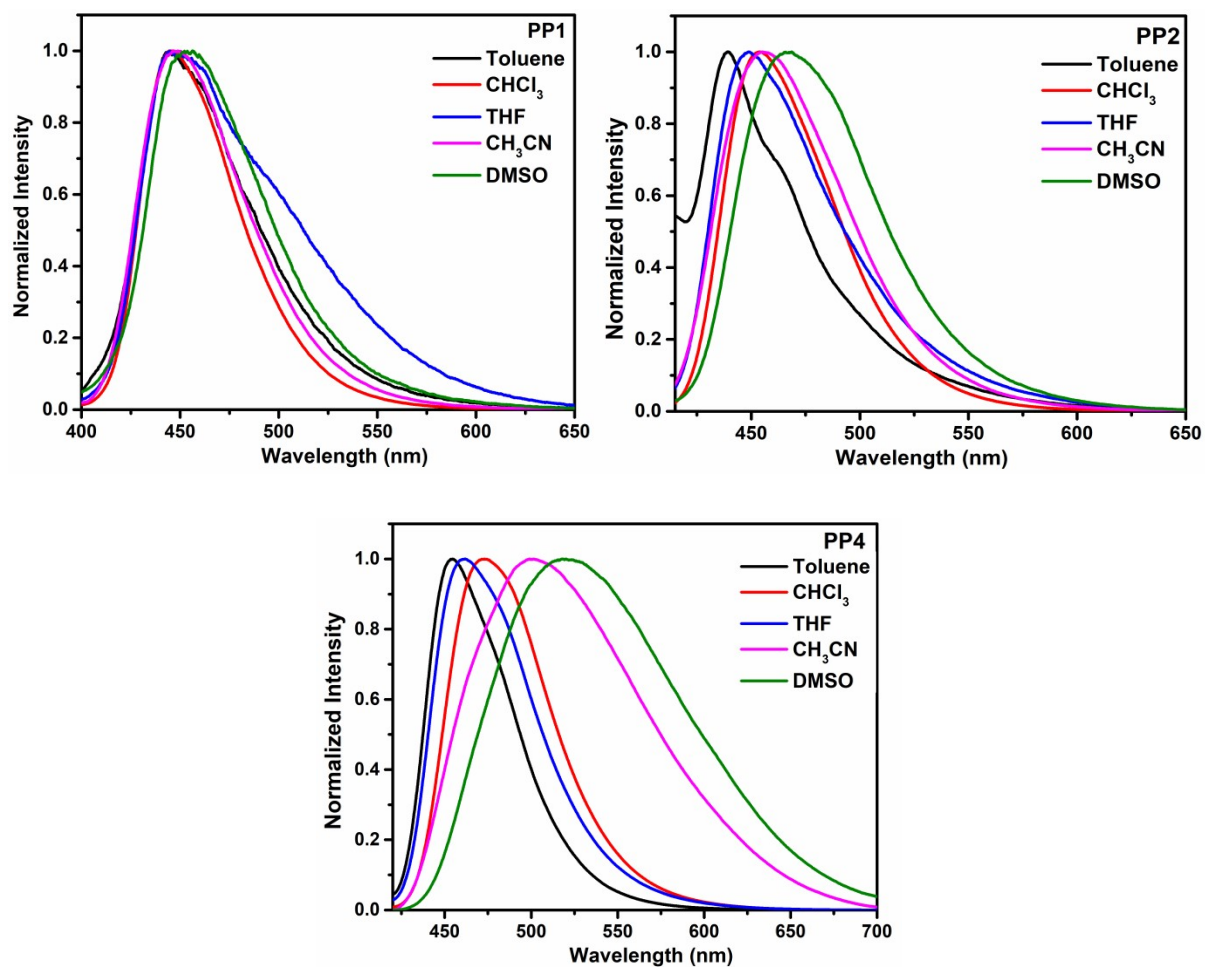

**Fig. S17.** Normalized emission spectra of **PP1-PP2** and **PP4** ( $2 \times 10^{-5}$  M) in solvents of differing polarity.

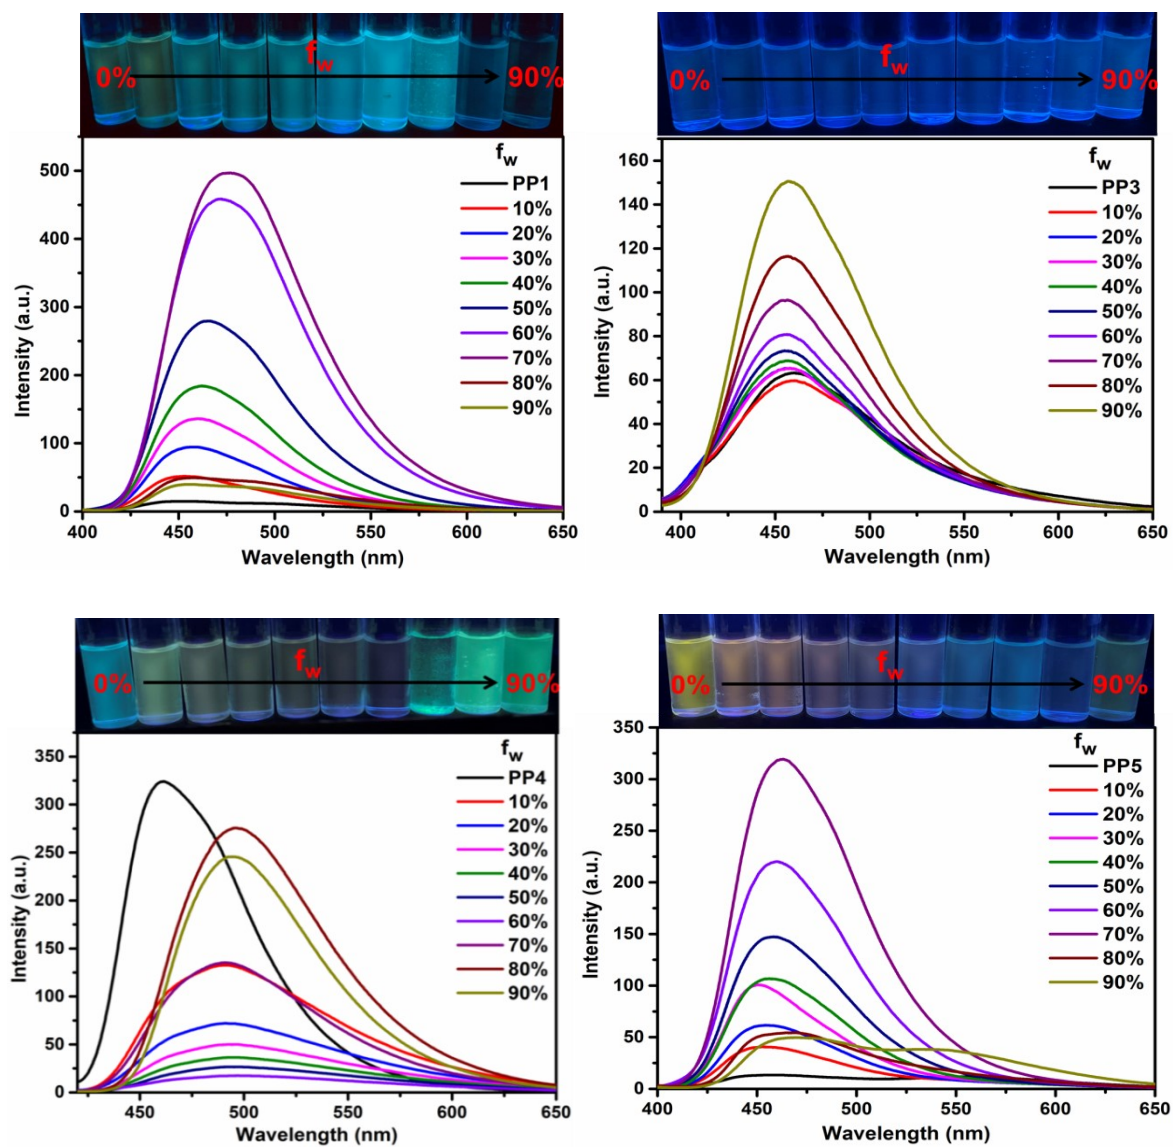

**Fig. S18.** Emission spectra of PP1, PP3-PP5 ( $2 \times 10^{-5}$ M) in THF-H<sub>2</sub>O fractions.

**Table S3:** Average particle size of the aggregates at different THF-H<sub>2</sub>O fractions.

| Compound | $f_w$ (%H <sub>2</sub> O) | Average diameter (nm) |
|----------|---------------------------|-----------------------|
| PP1      | 0                         | 420.6                 |
|          | 70                        | 1800                  |
|          | 90                        | 715.6                 |
| PP2      | 0                         | 761.3                 |
|          | 50                        | 1575                  |
|          | 90                        | 803.8                 |
| PP3      | 0                         | 442.6                 |
|          | 90                        | 3316                  |
| PP4      | 0                         | 1969                  |
|          | 70                        | 3134                  |
|          | 90                        | 2133                  |
| PP5      | 0                         | 924                   |
|          | 80                        | 1957                  |
|          | 90                        | 1279                  |

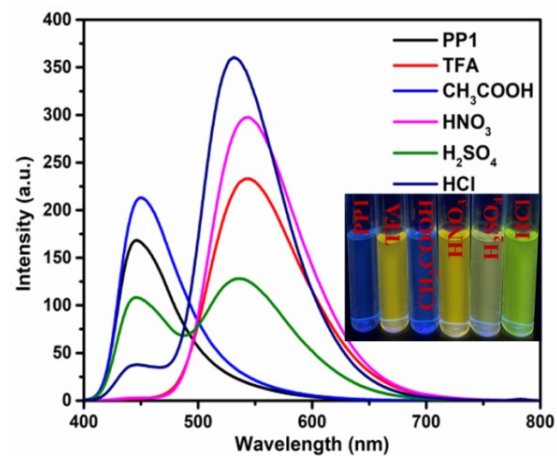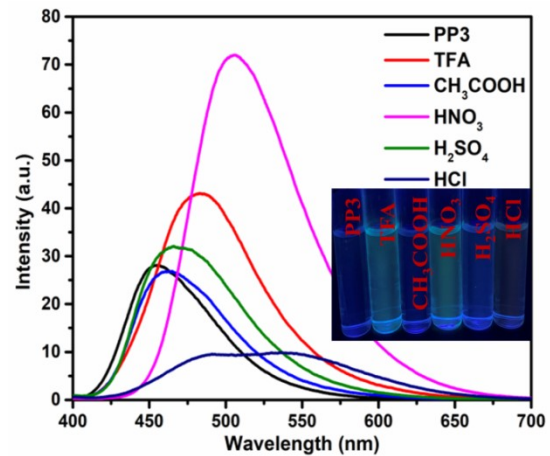

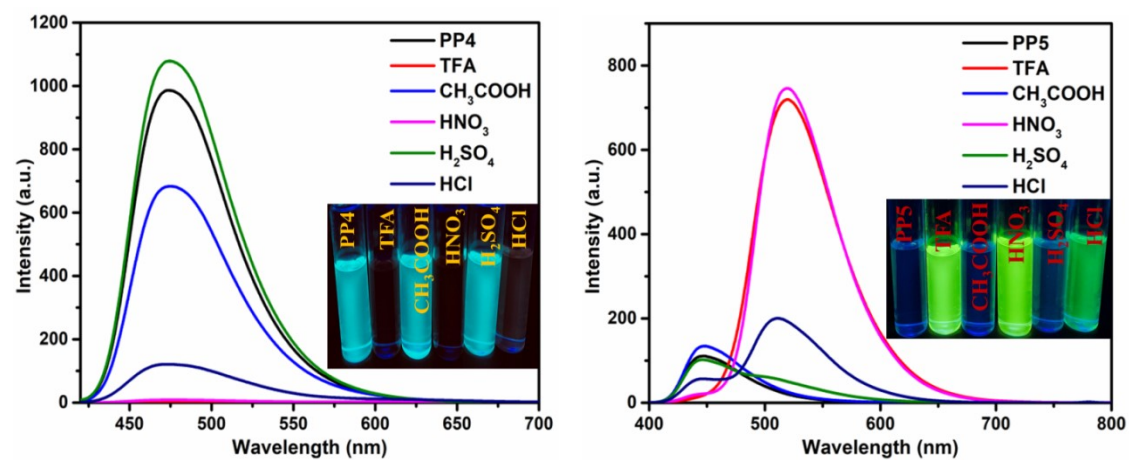

**Fig. S19.** The emission spectra of PP1, PP3-PP5 ( $2 \times 10^{-5}$ M) in presence of 0.02 mL of different acids in  $\text{CHCl}_3$ .

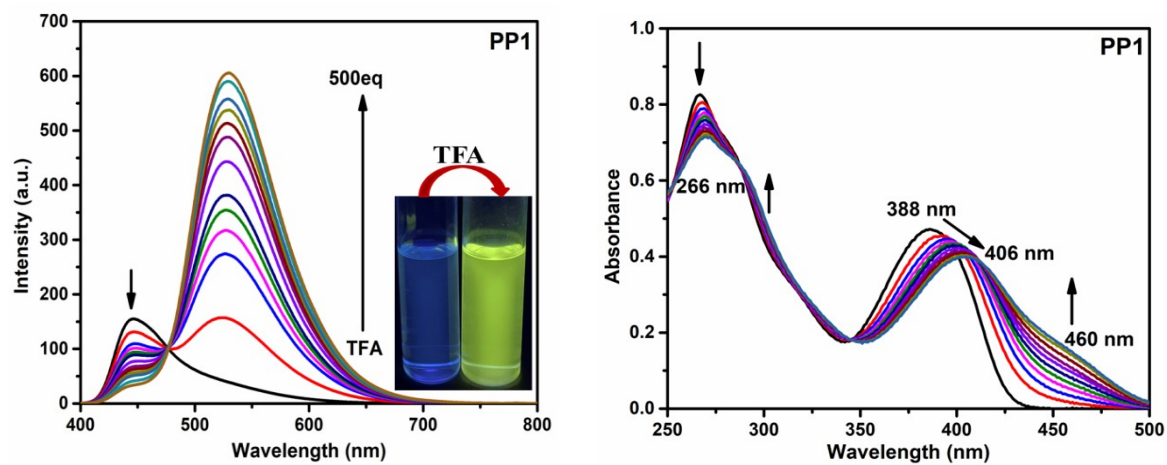

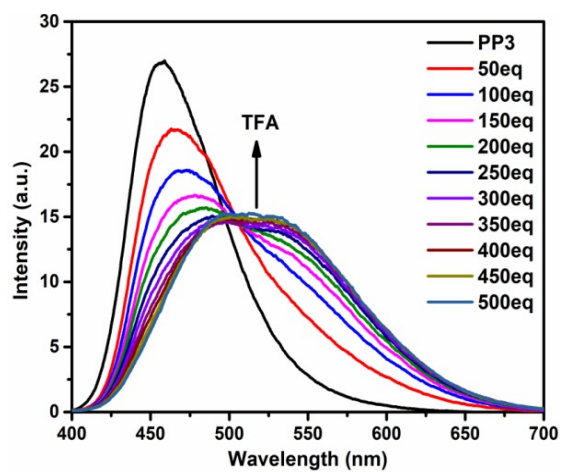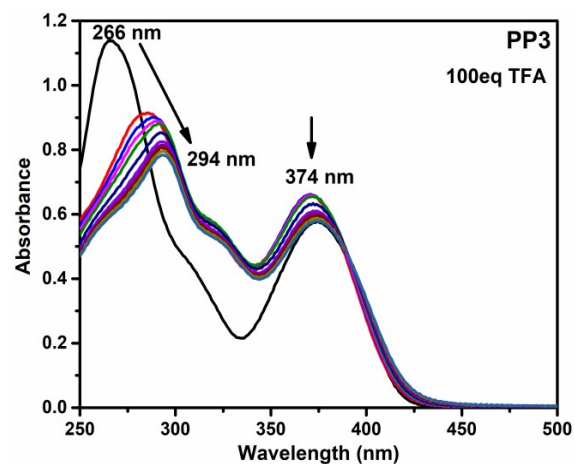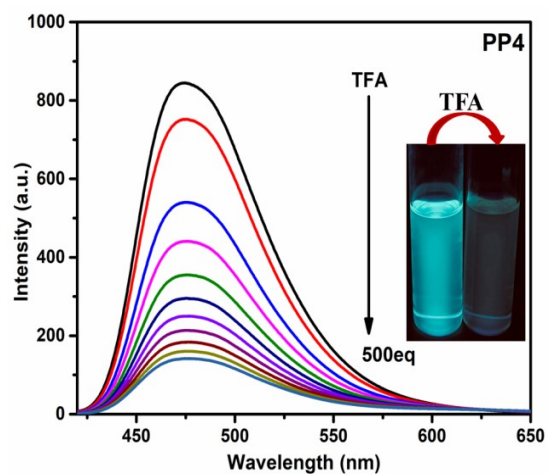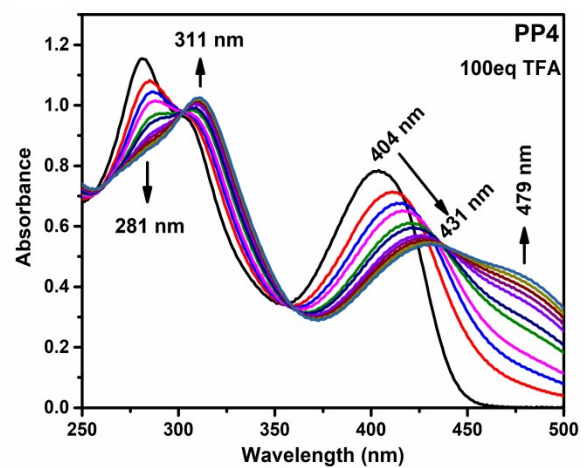

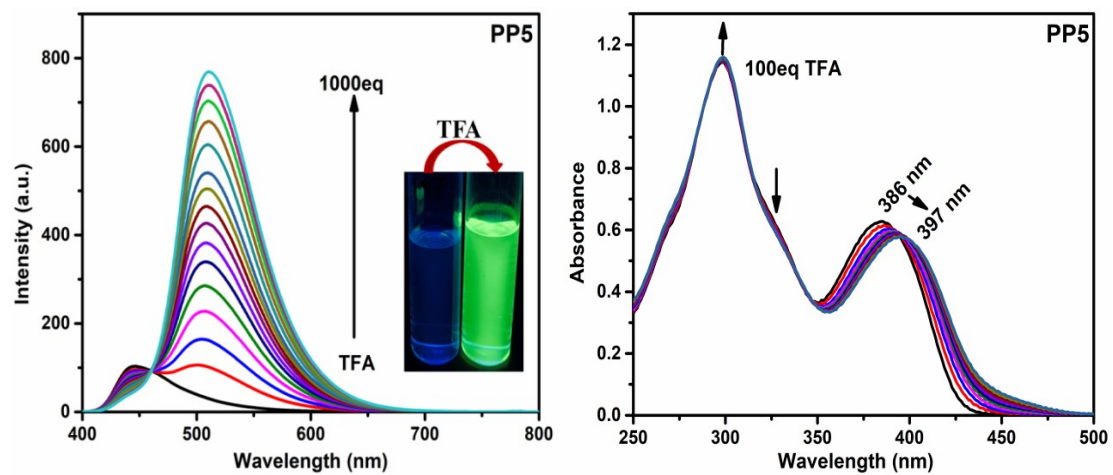

**Fig. S20.** The emission ( $2 \times 10^{-5}$  M) and absorption ( $1 \times 10^{-5}$  M) spectra of **PP1**, **PP3-PP5** as a function of the concentration of TFA added in  $\text{CHCl}_3$ . Inset: Photographs in  $\text{CHCl}_3$  before and after addition of TFA under UV light (365 nm).

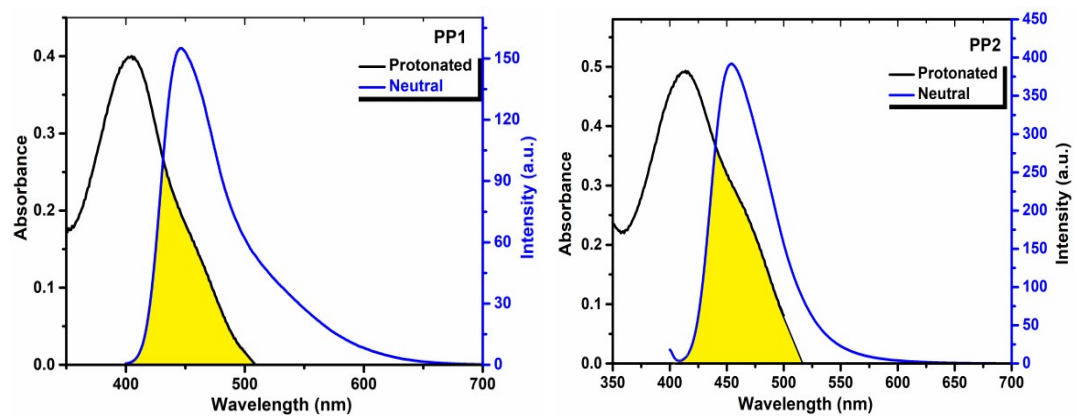



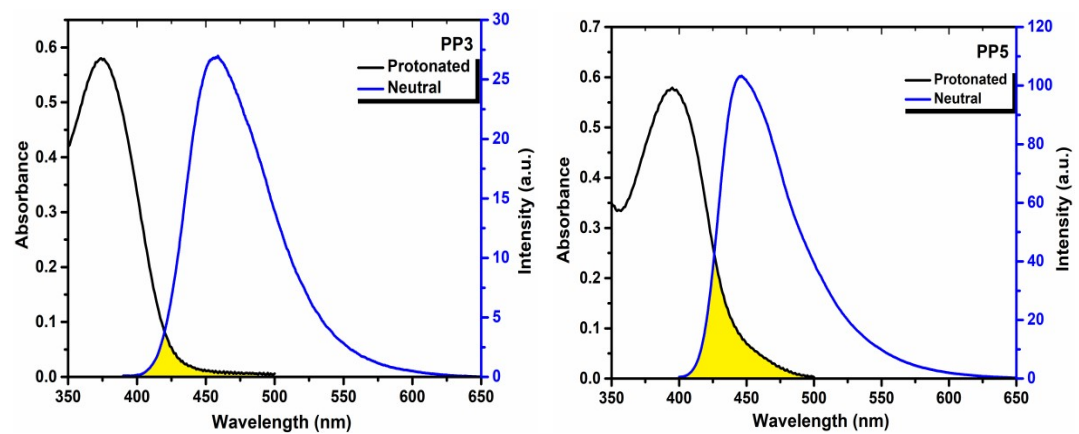

Fig. S21. Spectral overlap between the absorbance of protonated form and emission of neutral form of **PP1**, **PP3** and **PP5** in  $\text{CHCl}_3$ .

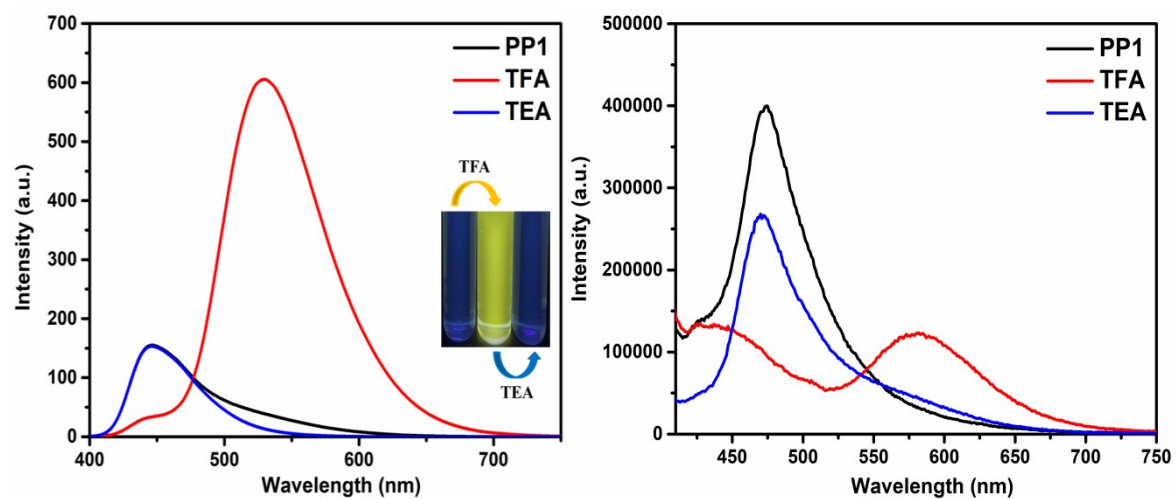

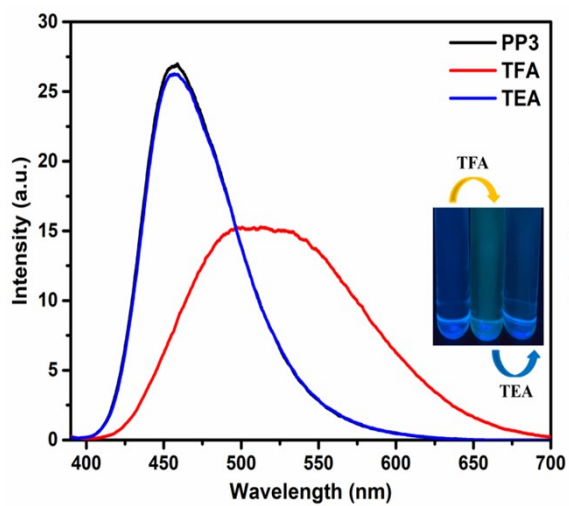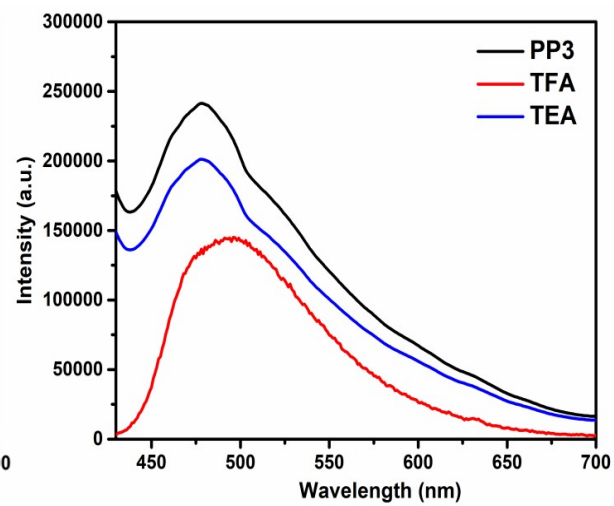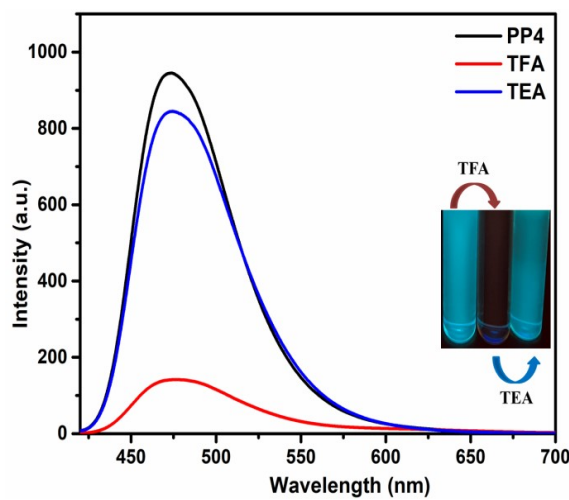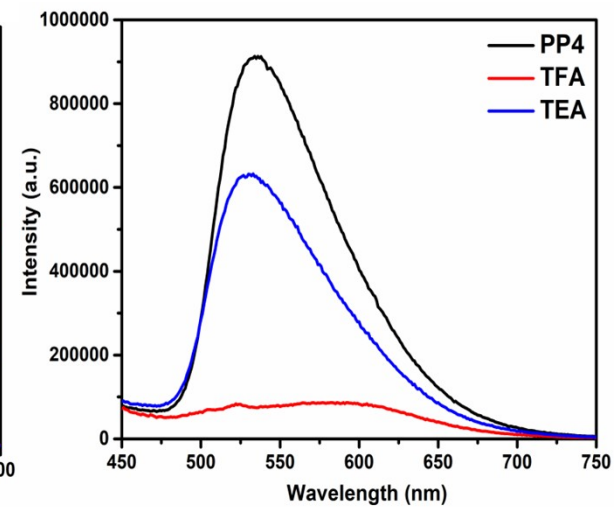

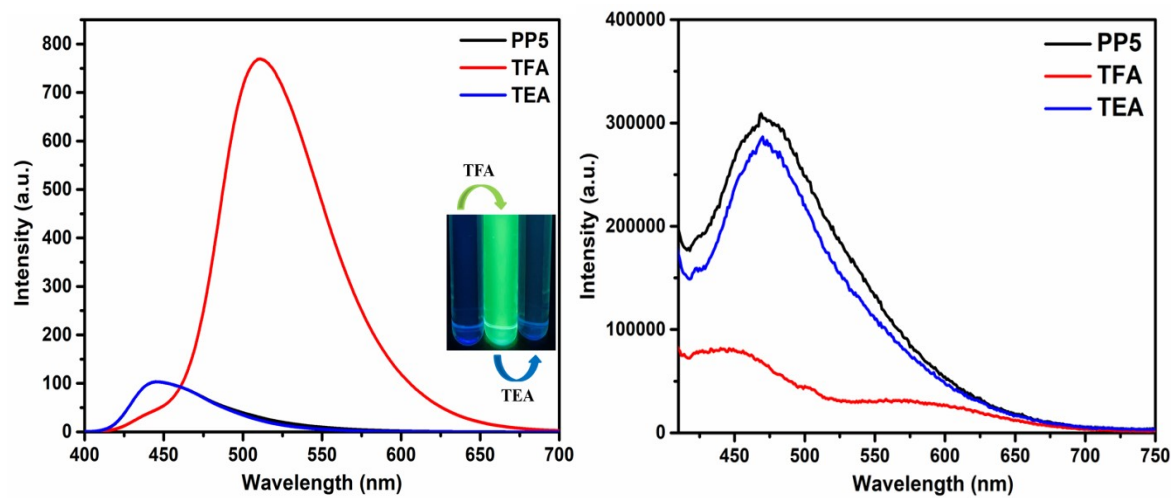

**Fig. S22.** Emission spectra of **PP1**, **PP3-PP5** after sequential addition of TFA and TEA in  $\text{CHCl}_3$  (inset: Images after sequential addition of TFA and TEA in  $\text{CHCl}_3$  under UV light) and solid state.

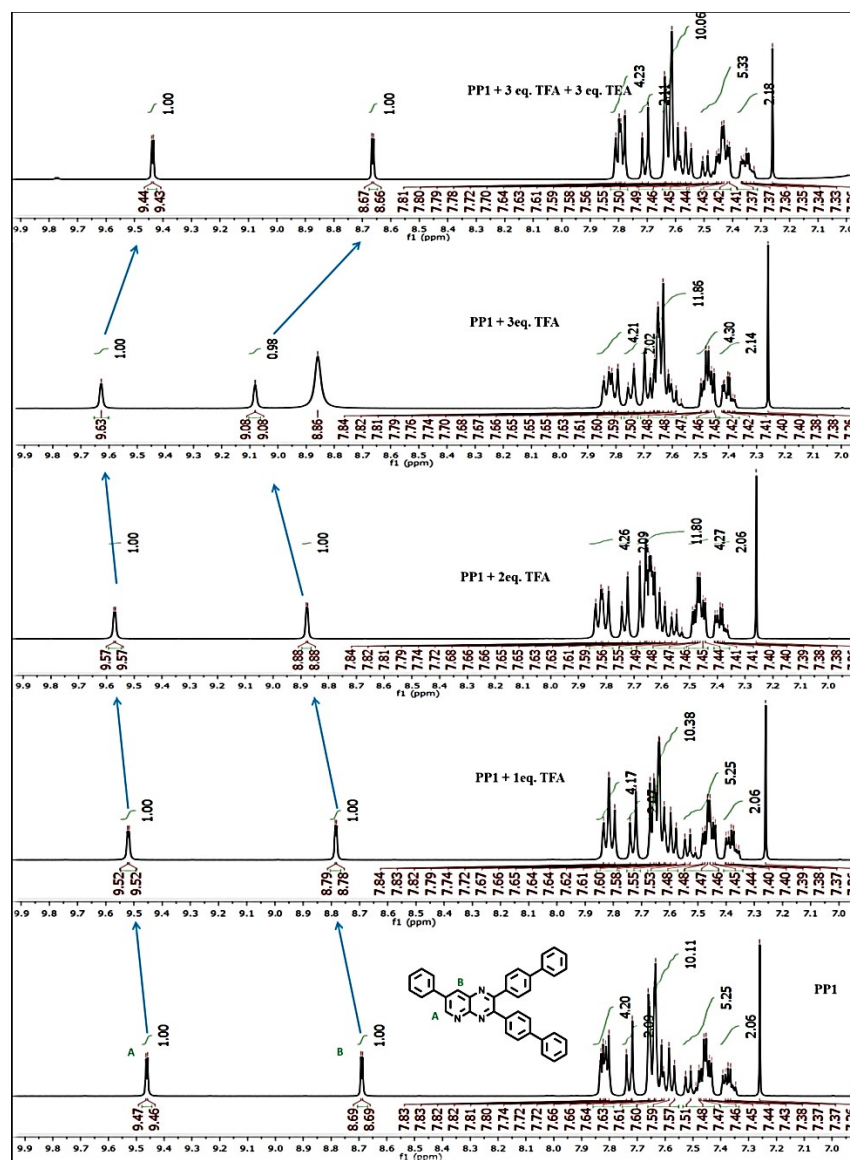

**Fig. S23.** Partial <sup>1</sup>H-NMR (400 MHz, CDCl<sub>3</sub>) titration spectra of **PP1** on sequential addition of 3 eq. of TFA and TEA.

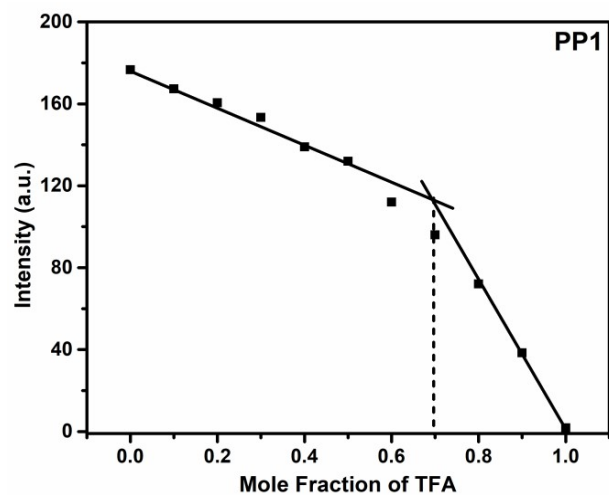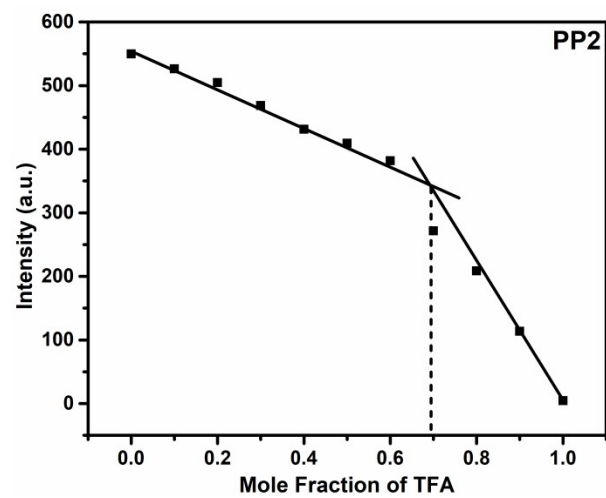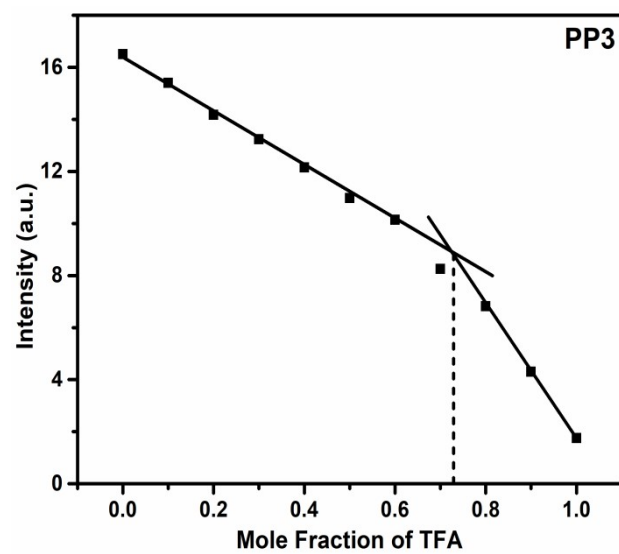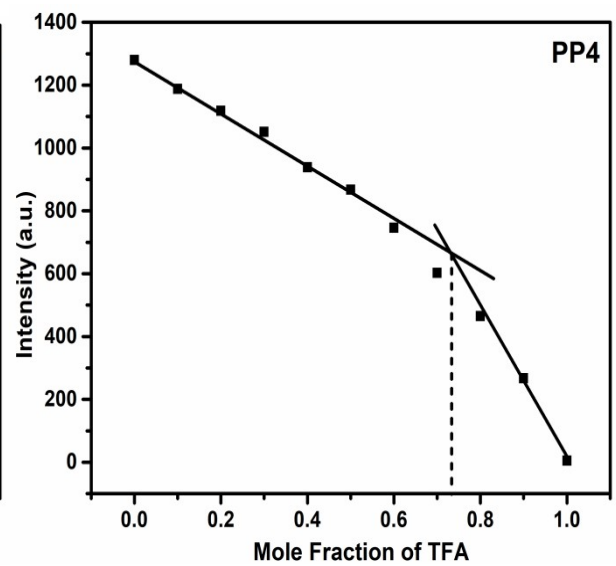

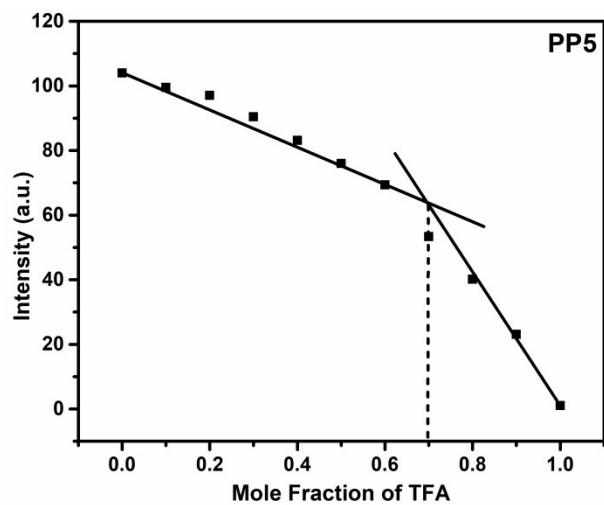

Fig. S24. Jobs plot to find binding stoichiometry of **PP1-PP5** ( $1 \times 10^{-5}$  M) with TFA in  $\text{CHCl}_3$ .

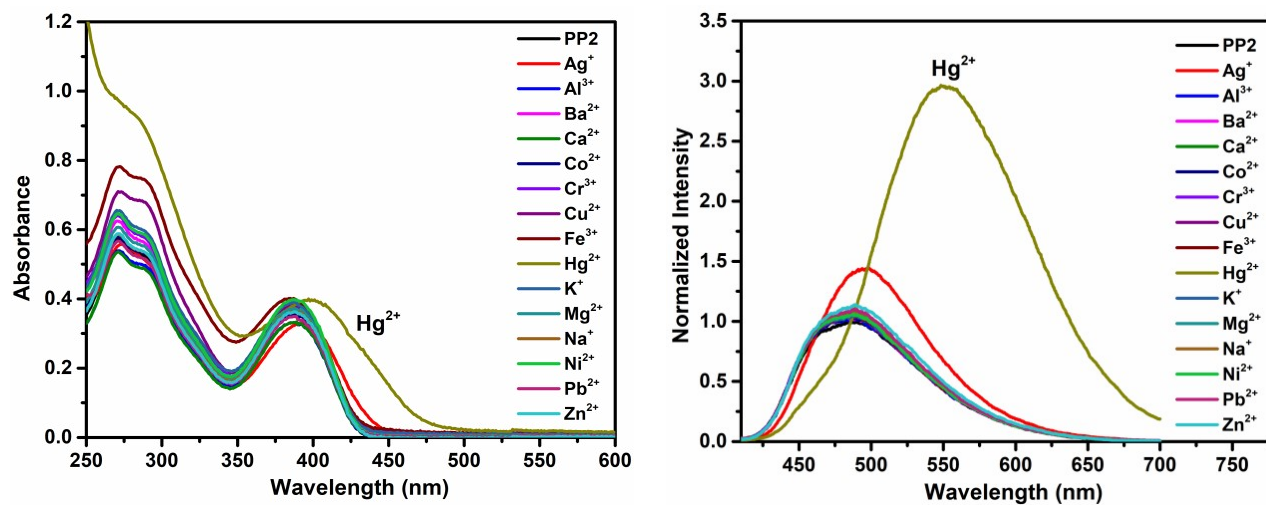

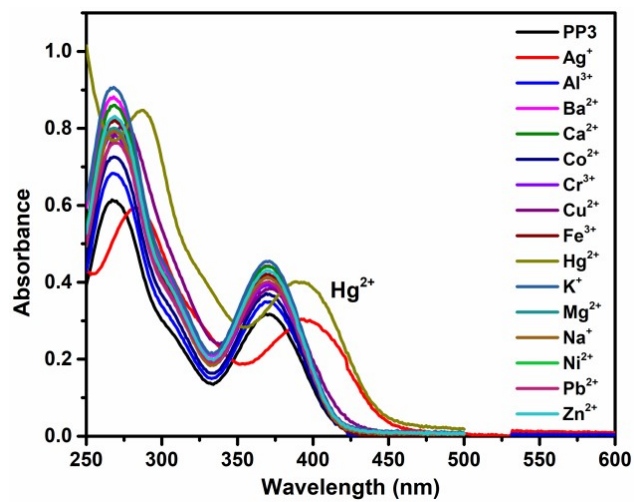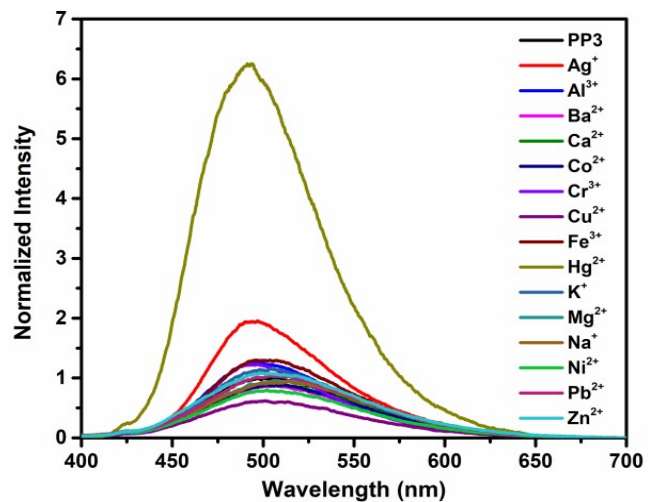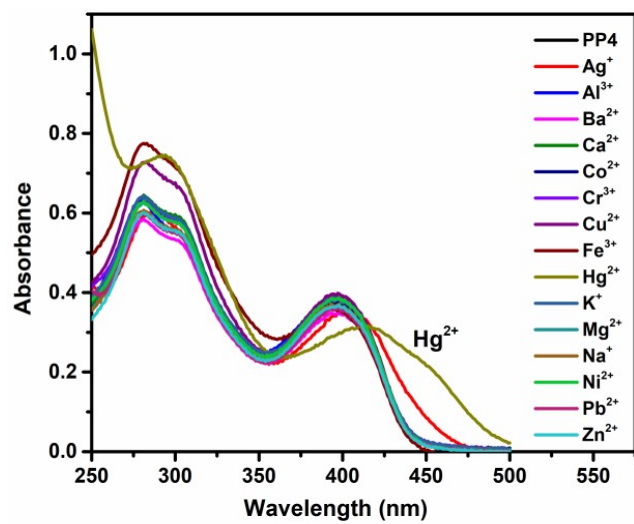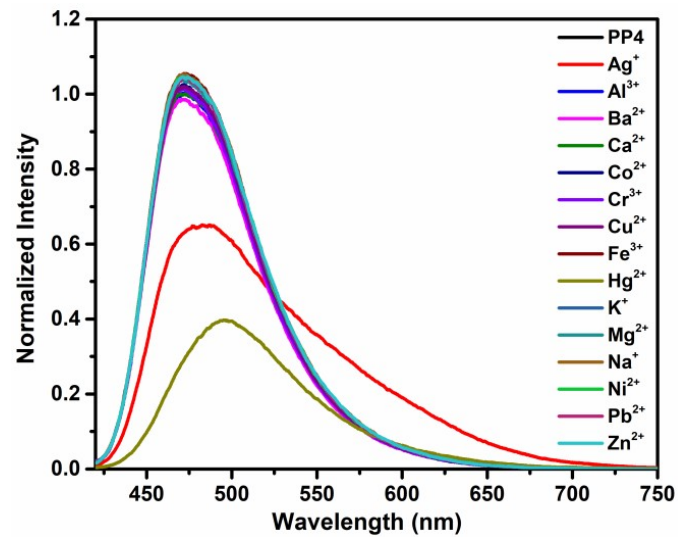

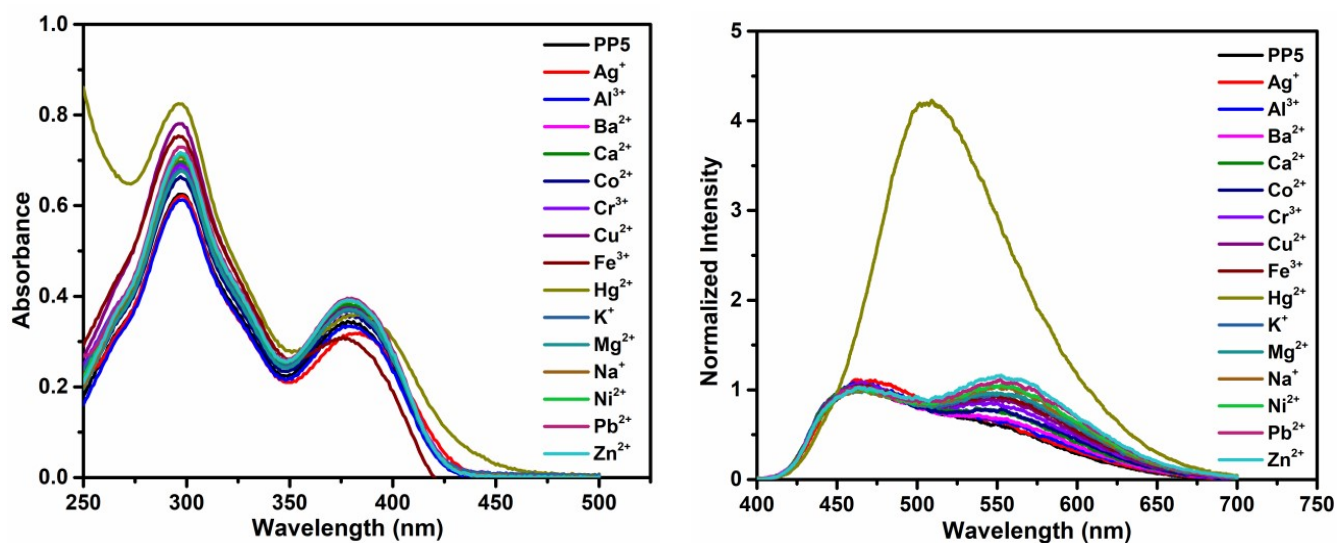

**Fig. S25.** Absorption and emission spectra of PP2-PP5 showing selectivity of probes towards Hg<sup>2+</sup> in presence of other competitive metal ions in THF-H<sub>2</sub>O mixtures.

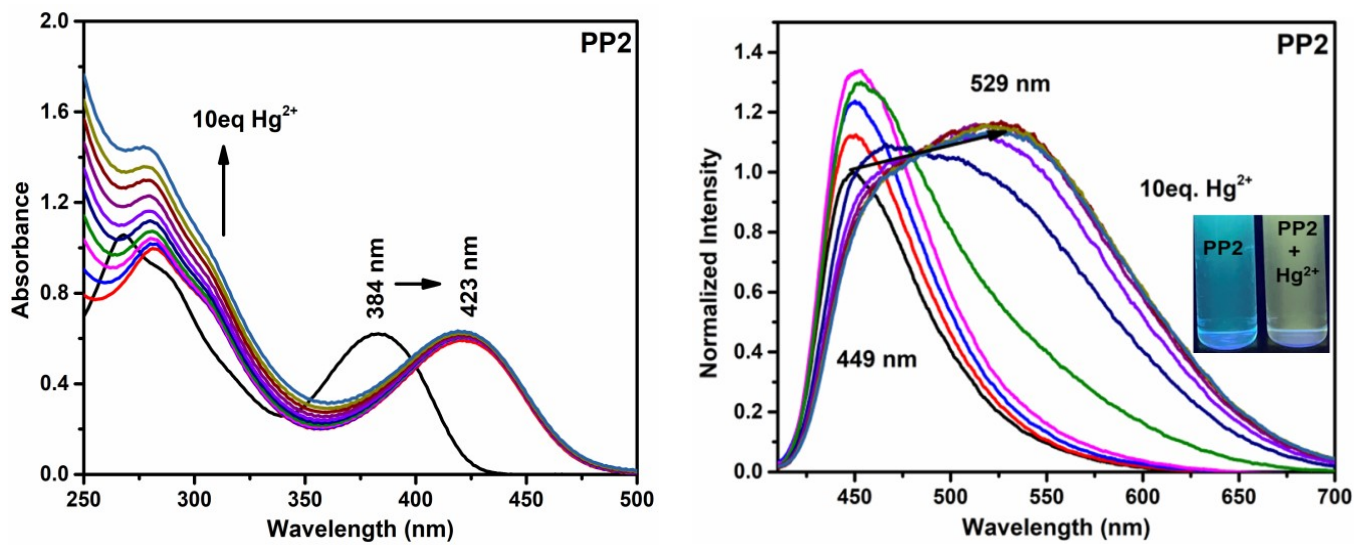



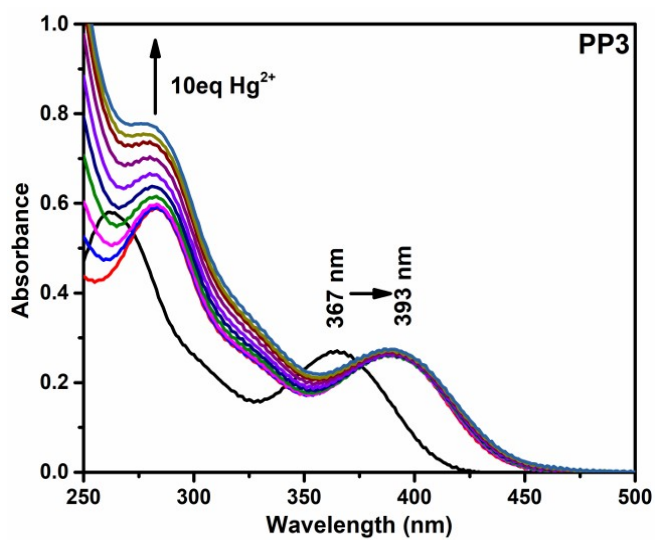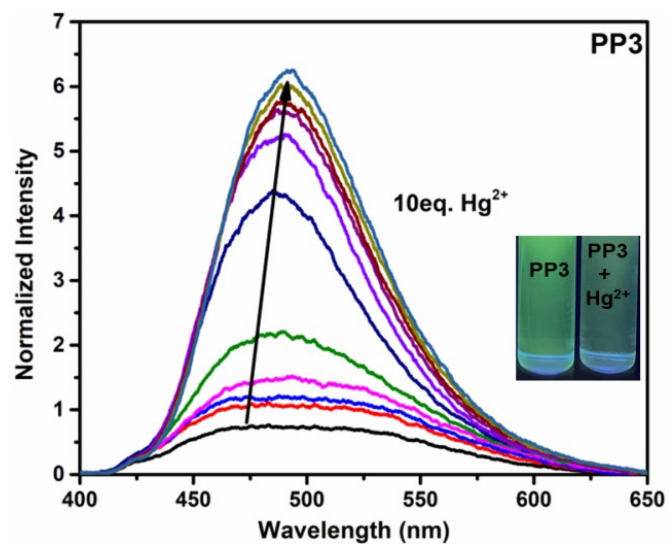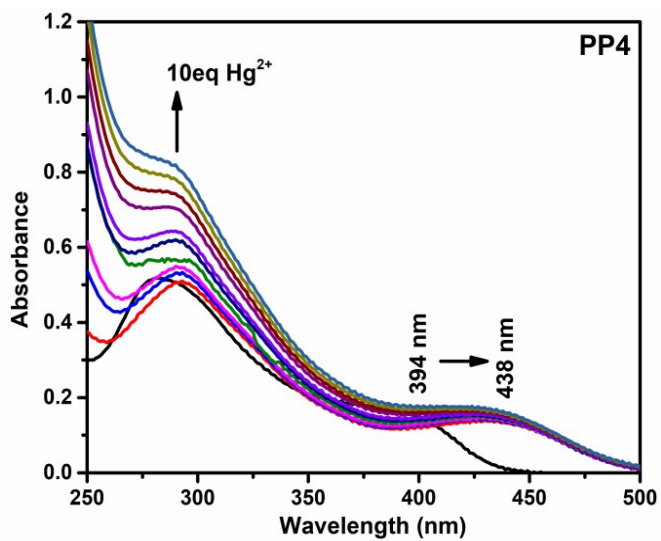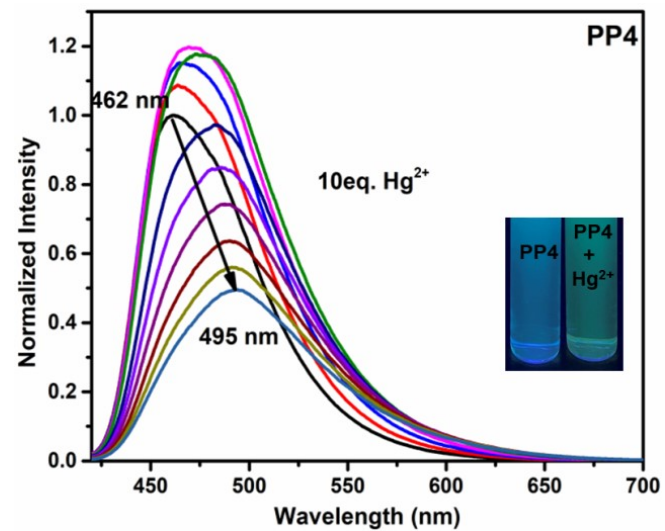

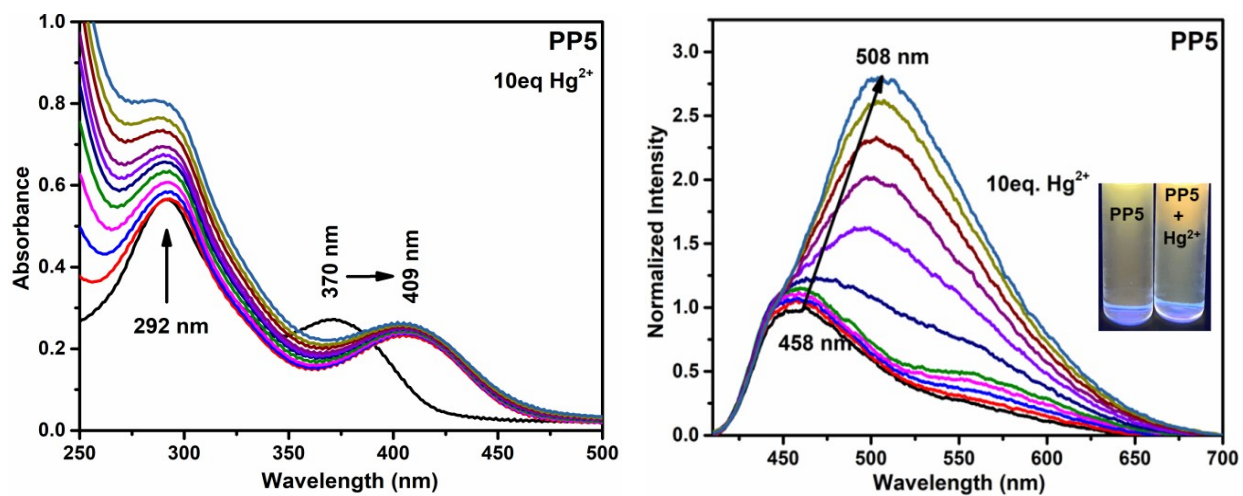

Fig. S26. The emission spectra of **PP2-PP5** as a function of Hg<sup>2+</sup> equivalents in THF-H<sub>2</sub>O mixtures.

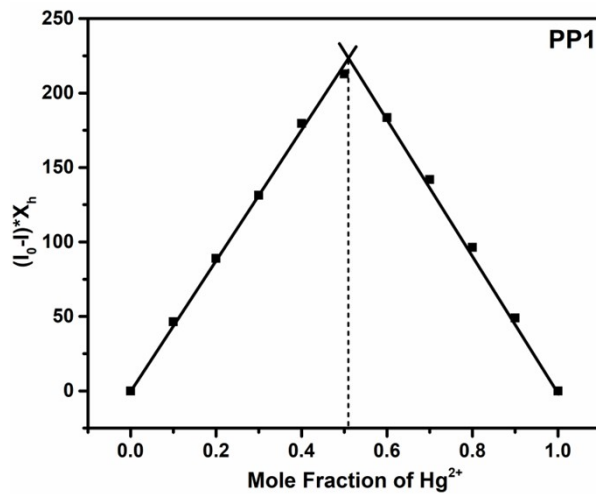

Fig. S27. Job's plot for **PP1** showing 1:1 binding stoichiometry with Hg<sup>2+</sup>.

**Table S4:** Limits of detection of **PP1-PP5** for TFA (in CHCl<sub>3</sub>) and Hg<sup>2+</sup> ions (in THF-H<sub>2</sub>O).

| Compounds  | D.L. of TFA       | D.L. of Hg <sup>2+</sup> |
|------------|-------------------|--------------------------|
|            | ( $\mu\text{M}$ ) | (nM)                     |
| <b>PP1</b> | 1.39              | 11.24                    |
| <b>PP2</b> | 1.20              | 18.59                    |
| <b>PP3</b> | 6.00              | 26.28                    |
| <b>PP4</b> | 0.35              | 2.74                     |
| <b>PP5</b> | 0.78              | 9.36                     |

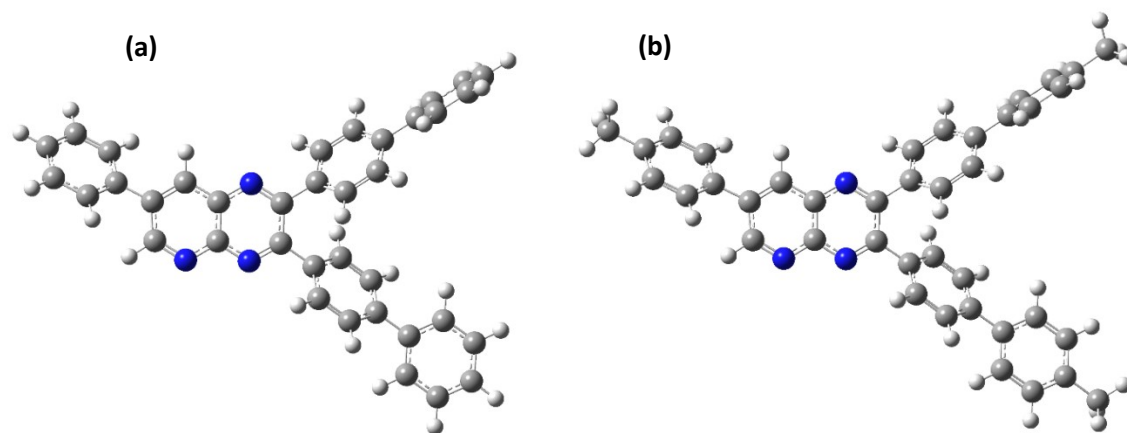

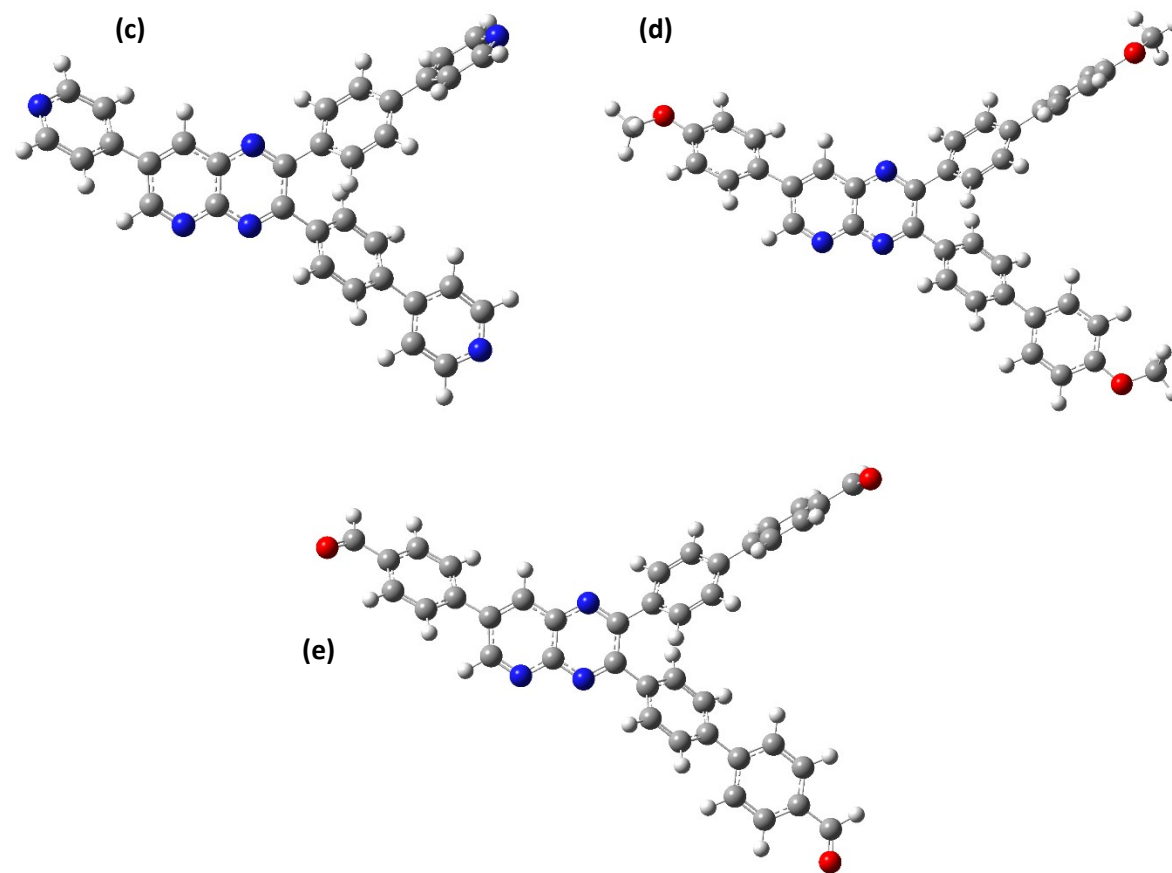

**Fig. S28.** Optimized structures of (a) PP1, (b) PP2, (c) PP3, (d) PP4, (e) PP5 (Color code: C-grey, N-blue, H-white, O-red).

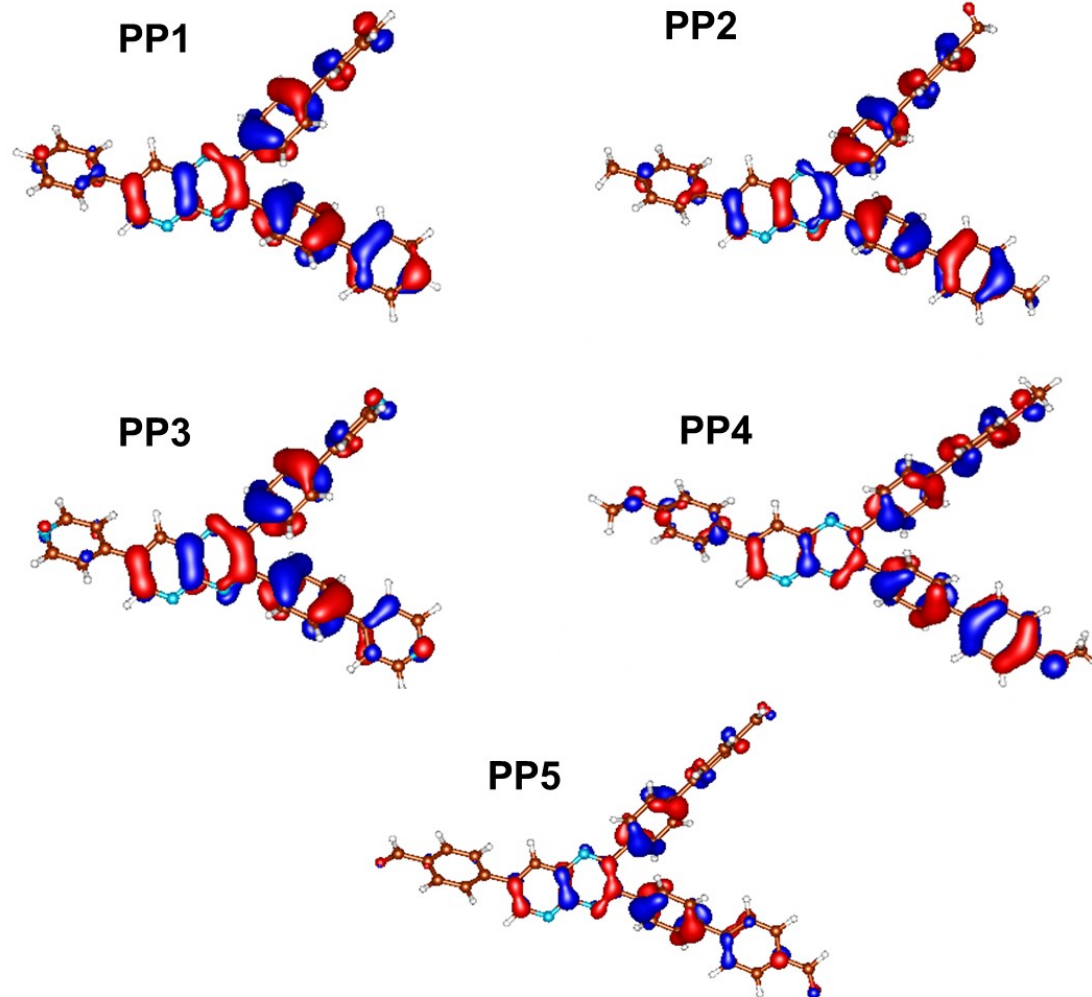

**Fig. S29.** The HOMO of PP1-PP5.

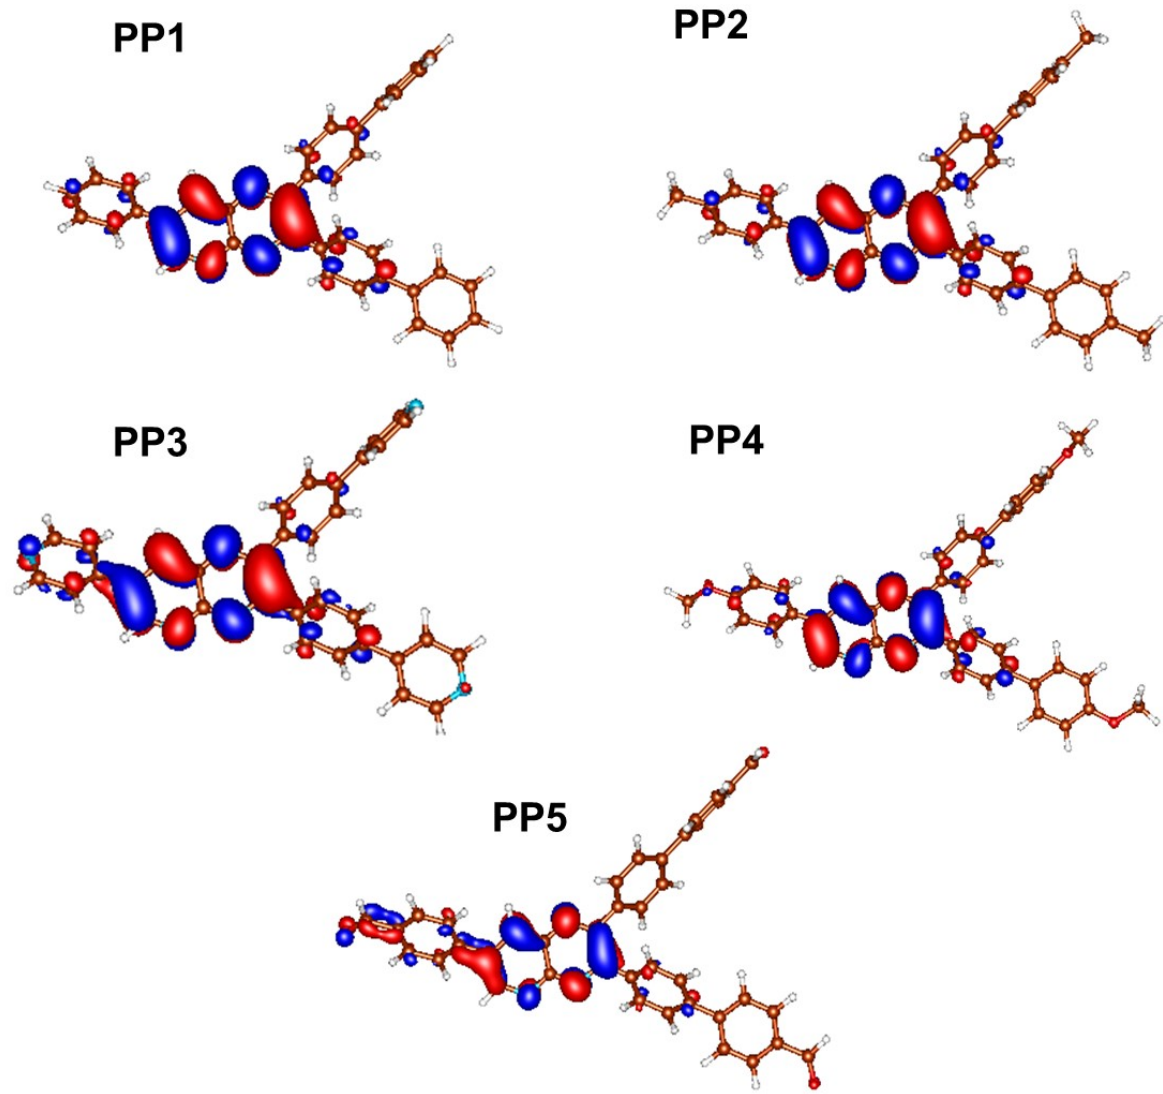

Fig. S30. The LUMO of PP1-PP5.

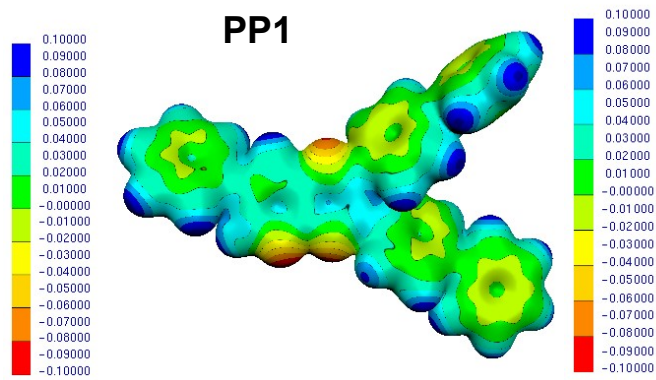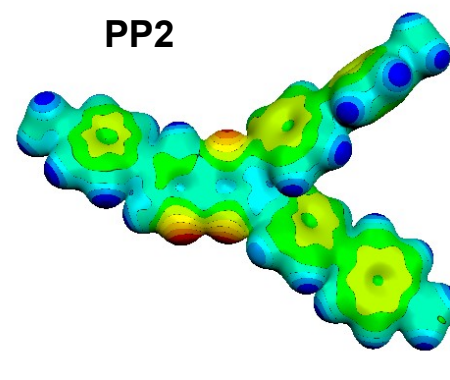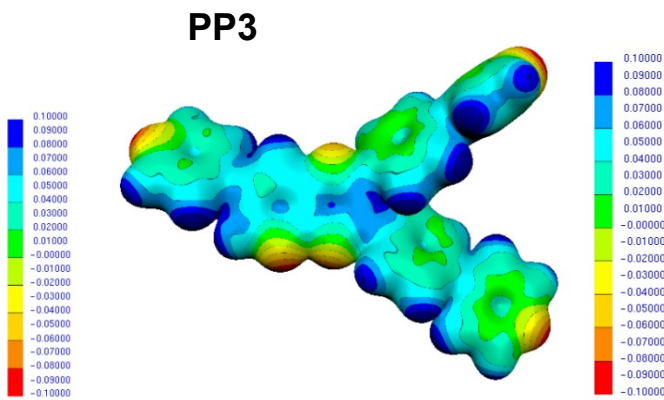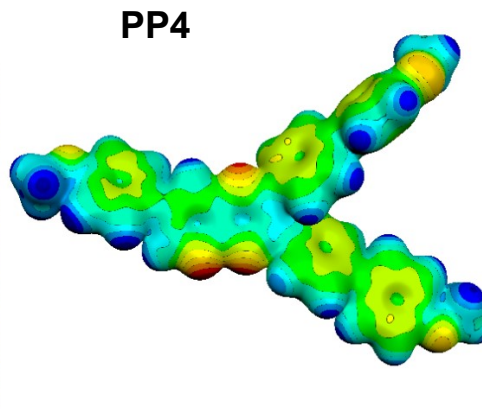

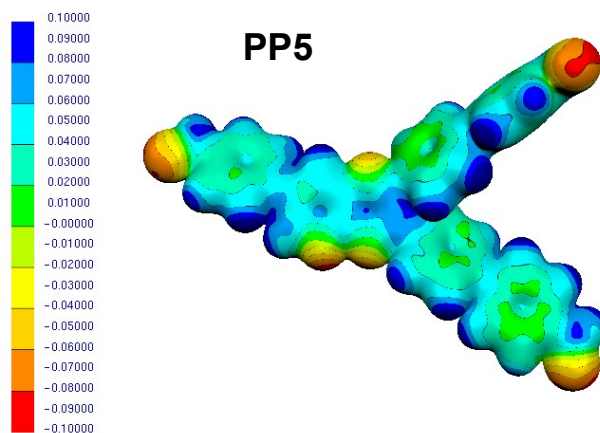

**Fig. S31.** Electrostatic potential mapped on the electron density surface of **PP1-PP5** (iso-value = 0.02 a.u.). Red centers indicate electron-rich centers.

**Table S5.** Calculated TDDFT absorption and emission wavelengths (nm), oscillator strengths, and major composition in terms of MO contribution for **PP1-PP5**.

| Compound   | $\lambda_{\text{abs}}$<br>(nm) | Oscillator<br>strengths <sub>abs</sub> | $\lambda_{\text{em}}$<br>(nm) | Oscillator<br>strengths <sub>em</sub> | Major composition |
|------------|--------------------------------|----------------------------------------|-------------------------------|---------------------------------------|-------------------|
| <b>PP1</b> | 390.96                         | 0.8254                                 | 467.73                        | 1.1468                                | HOMO → LUMO (69%) |
| <b>PP2</b> | 400.63                         | 0.8731                                 | 478.74                        | 1.2148                                | HOMO → LUMO (69%) |
| <b>PP3</b> | 376.62                         | 0.6655                                 | 410.69                        | 0.9872                                | HOMO → LUMO (62%) |
| <b>PP4</b> | 419.39                         | 0.8770                                 | 499.22                        | 1.2063                                | HOMO → LUMO (69%) |
| <b>PP5</b> | 392.43                         | 1.1616                                 | 482.44                        | 1.7121                                | HOMO → LUMO (69%) |



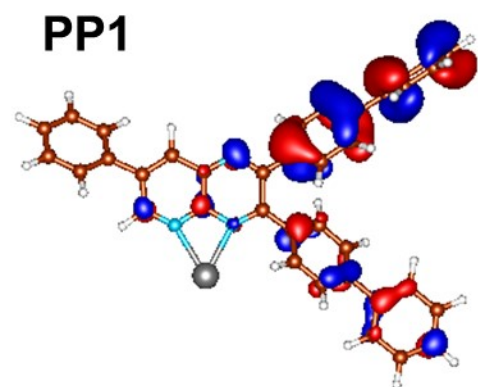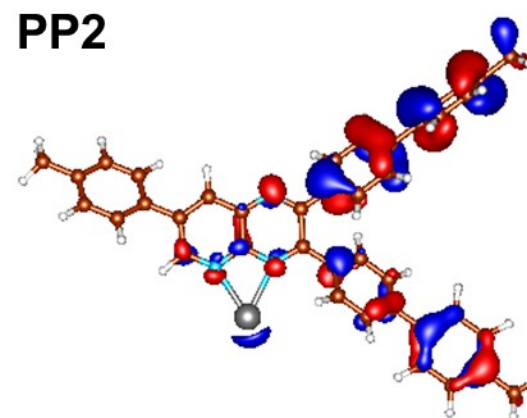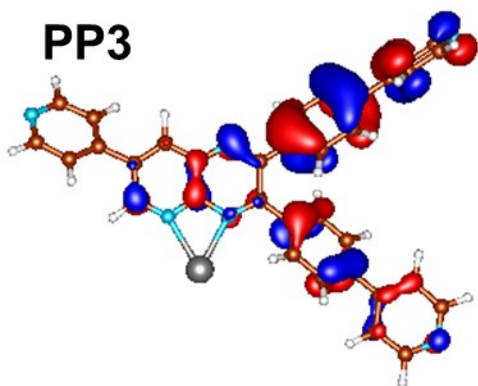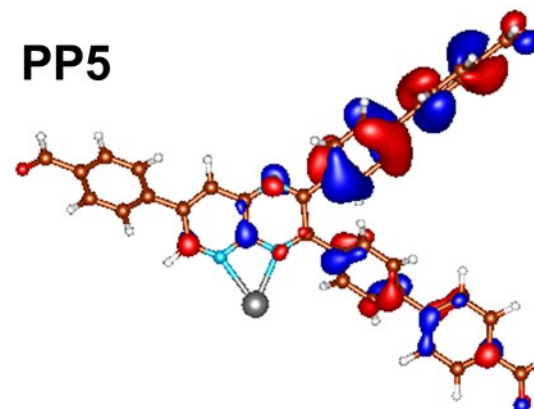

**Fig. S32.** The HOMO for complexes of  $\text{Hg}^{2+}$  with **PP1-PP3**, **PP5** (iso-value = 0.03 a.u.).

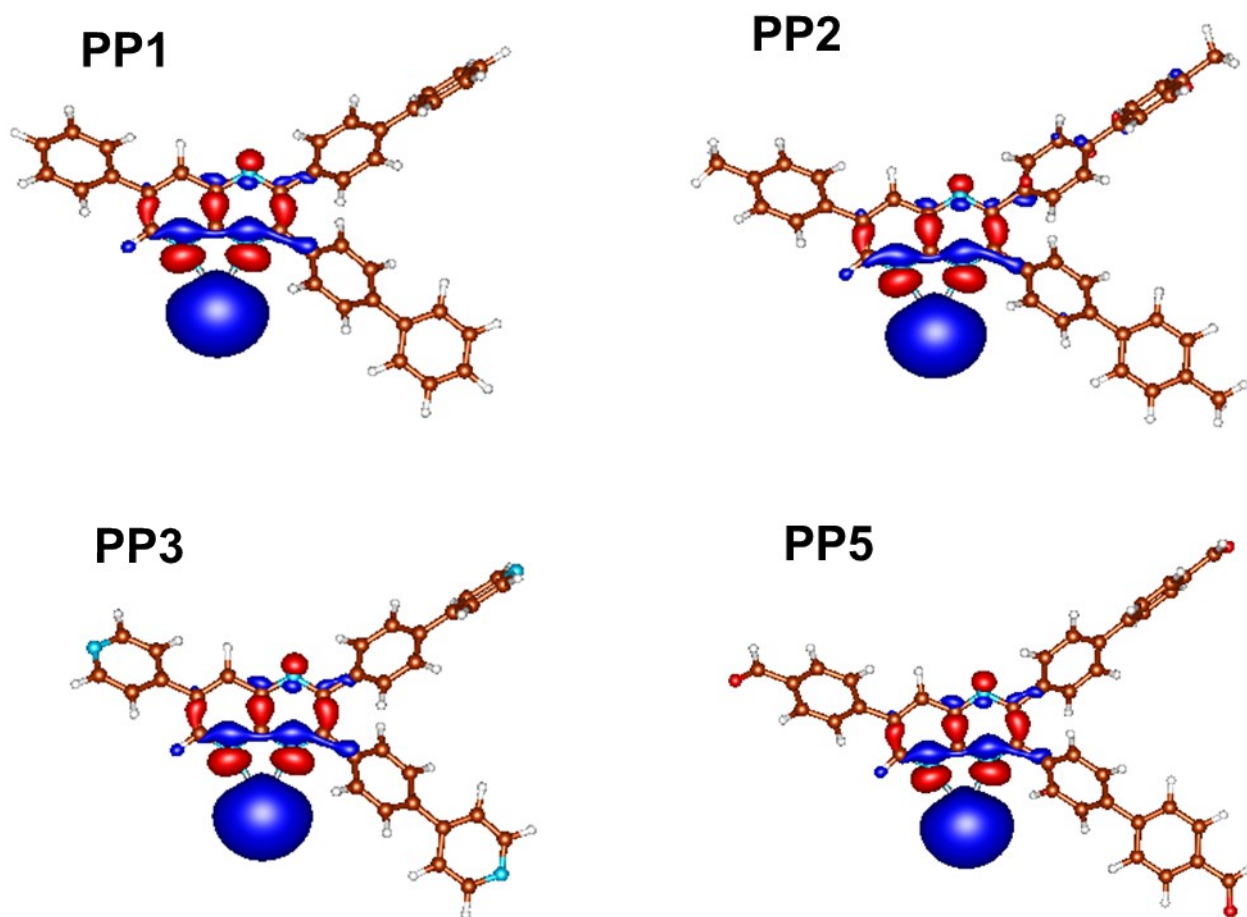

Fig. S33. The LUMO for complexes of  $\text{Hg}^{2+}$  with PP1-PP3, PP5 (iso-value = 0.03 a.u.).

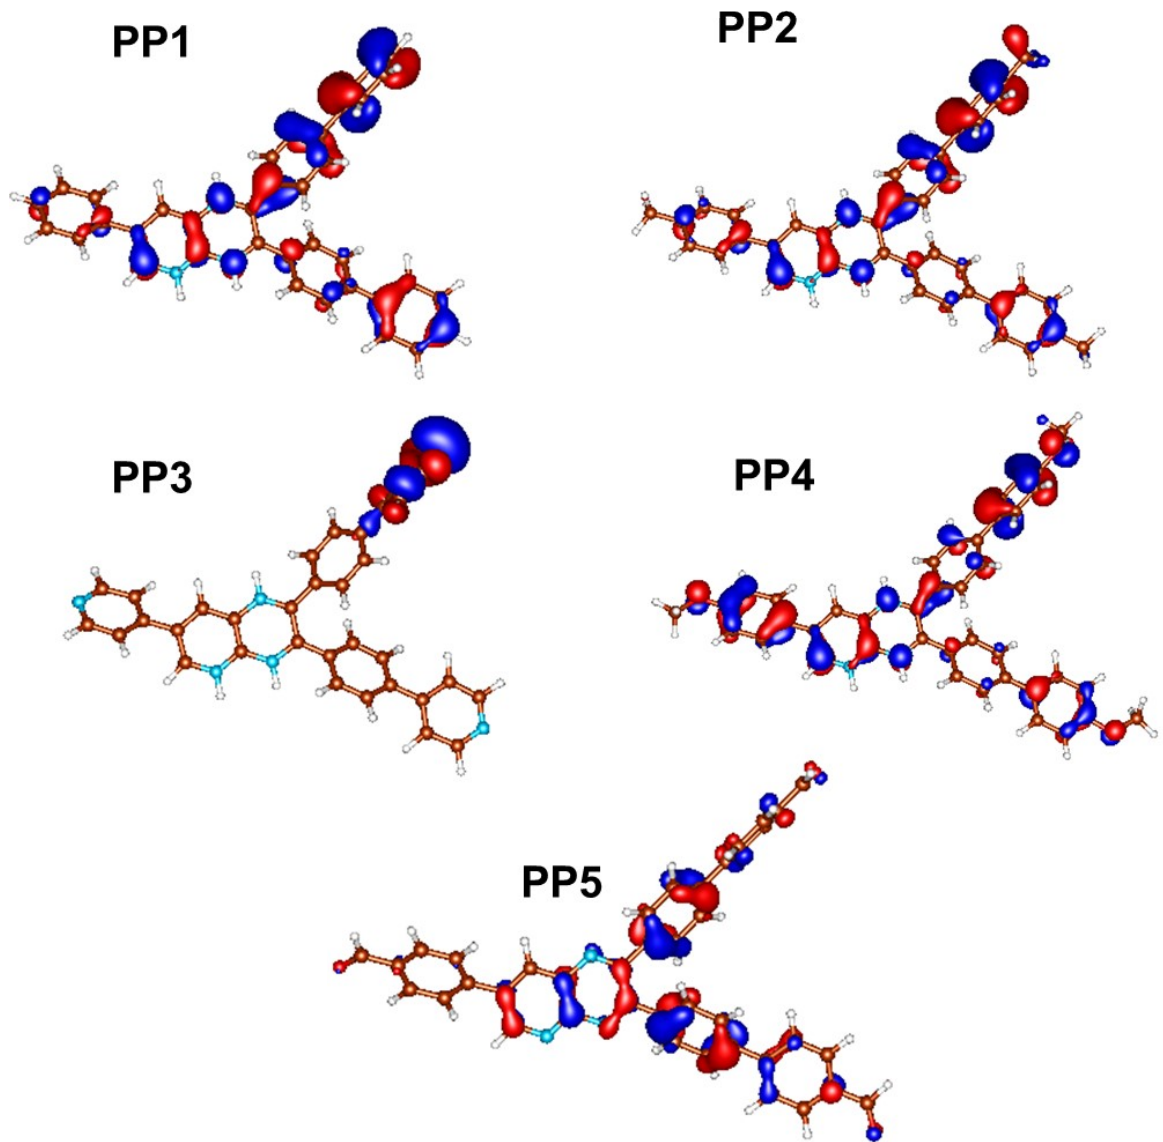

Fig. S34. The HOMO for complexes of TFA with **PP1-PP5** (iso-value = 0.03 a.u.).

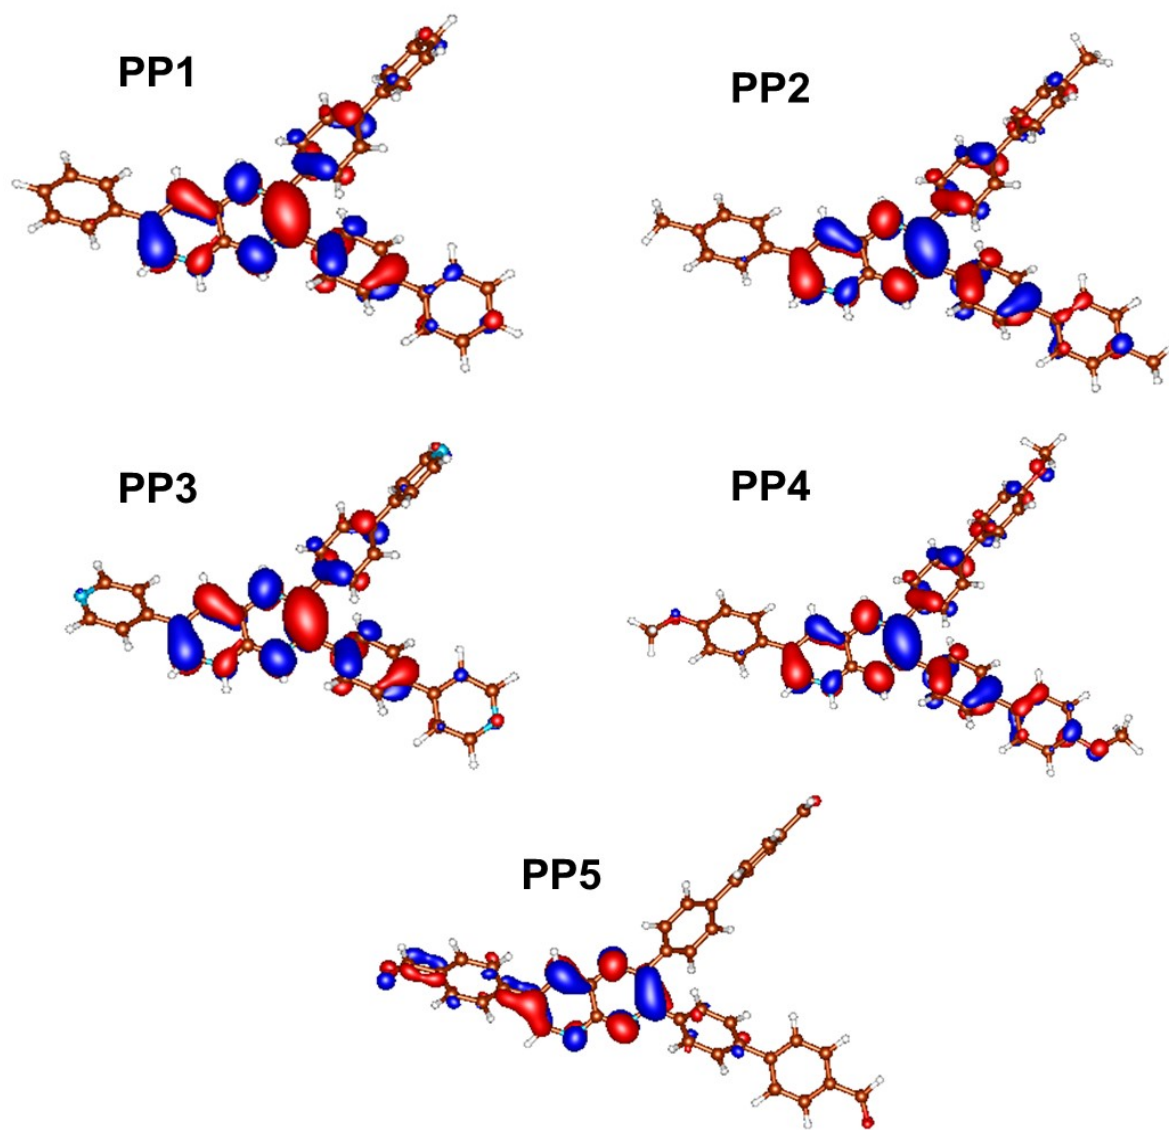

**Fig. S35.** The LUMO for complexes of TFA with **PP1-PP5** (iso-value = 0.03 a.u.).

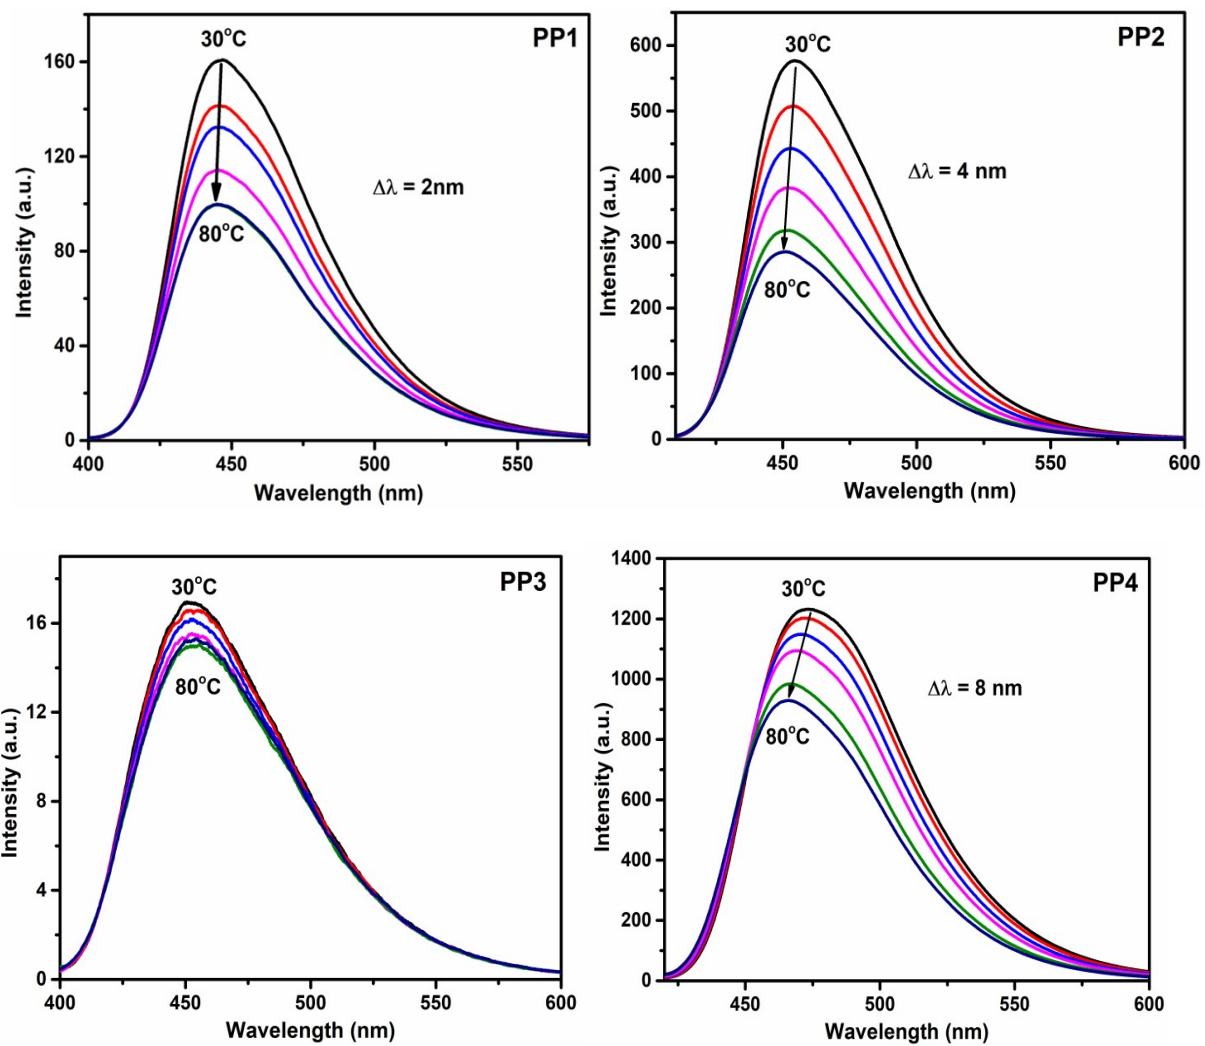

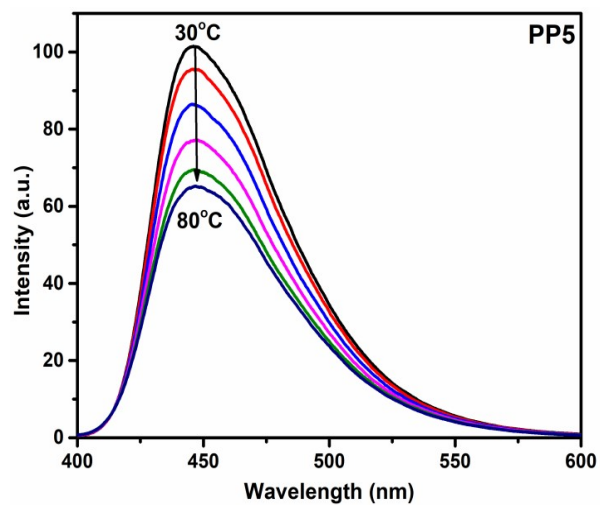

**Fig. S36.** Temperature dependent changes in the emission spectra of **PP1-PP5** in  $\text{CHCl}_3$  ( $1 \times 10^{-5}$  M).

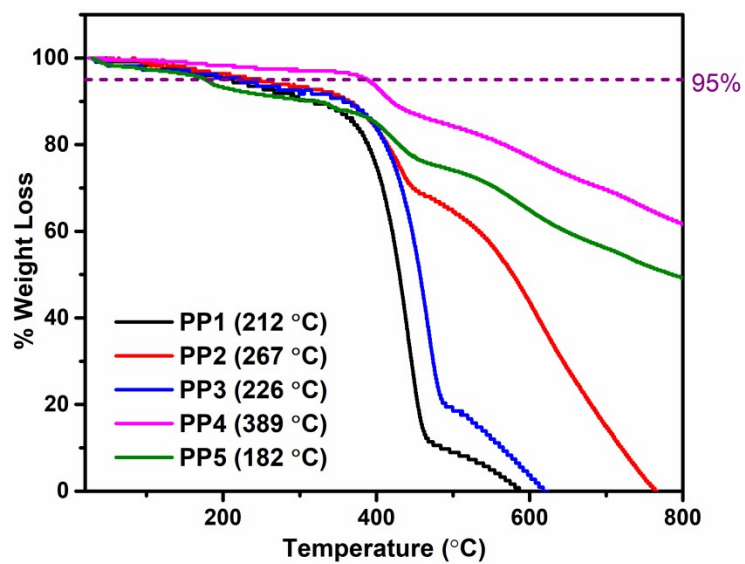

**Fig. S37.** TGA profiles of **PP1-PP5** representing their decomposition temperatures at 5% weight loss.
